# Supplementary material for: Gesellschaftliche Leistungen des Ökolandbaus
Source: Royal Society of Chemistry journal article supplement (doi:10.1039/d3ob01723k), 2012-01-01
Supplement: d3ob01723k1.pdf [file d3ob01723k1.pdf]

Supporting Information for

## Controlled oligomeric guest stacking by cucurbiturils in water

Fengbo Liu, Amine Kriat, Roselyne Rosas, David Bergé-Lefranc, Didier Gigmes, Simon Pascal,  
Olivier Siri, Simin Liu, Anthony Kermagoret, David Bardelang

### Table of Contents

|                                                                                                                       |     |
|-----------------------------------------------------------------------------------------------------------------------|-----|
| <b>- Experimental procedures</b>                                                                                      |     |
| 1/ Chemical compounds -----                                                                                           | S2  |
| 2/ NMR Measurements -----                                                                                             | S2  |
| 3/ ITC measurements -----                                                                                             | S2  |
| 4/ Absorption and fluorescence spectroscopies -----                                                                   | S2  |
| <b>- Additional data</b>                                                                                              |     |
| 5/ <sup>1</sup> H NMR spectrum of <b>T-VPI</b> -----                                                                  | S3  |
| 6/ <sup>1</sup> H NMR spectrum of <b>VPI-N</b> -----                                                                  | S4  |
| 7/ NMR and ITC study of <b>VPI-N</b> dimerization -----                                                               | S5  |
| 8/ <sup>1</sup> H NMR titration of <b>T-VPI</b> with CB[8] -----                                                      | S7  |
| 9/ <sup>1</sup> H NMR titration of <b>VPI-N</b> with CB[8] -----                                                      | S7  |
| 10/ Preparation and NMR spectra of CB[8] <sub>2</sub> • <b>T-VPI</b> <sub>2</sub> -----                               | S8  |
| 11/ Preparation and NMR spectra of CB[8] <sub>2</sub> • <b>VPI-N</b> <sub>2</sub> -----                               | S9  |
| 12/ Preparation and NMR spectra of <b>T-VPI</b> with CB[10] -----                                                     | S11 |
| 13/ Preparation and NMR spectra of CB[10] <sub>2</sub> • <b>VPI-N</b> <sub>3</sub> -----                              | S12 |
| 14/ ITC study of <b>VPI-N</b> with CB[8] -----                                                                        | S15 |
| 15/ Competition NMR for the determination of binding constants -----                                                  | S16 |
| 16/ UV-visible and fluorescence spectra -----                                                                         | S20 |
| 17/ Preparation and NMR spectra of CB[8] <sub>2</sub> • <b>T-VPI</b> <sub>2</sub> •Ag <sup>+</sup> <sub>2</sub> ----- | S22 |
| 18/ Preparation and NMR spectra of CB[8] <sub>2</sub> • <b>VPI-N</b> <sub>2</sub> •Ag <sup>+</sup> <sub>2</sub> ----- | S23 |
| 19/ Preparation and NMR spectra of CB[8] <sub>2</sub> • <b>VPI-N-H</b> <sup>+</sup> <sub>2</sub> -----                | S24 |
| 20/ Preparation and NMR spectra of CB[8] <sub>2</sub> • <b>T-VPI</b> <sub>2</sub> with TFA -----                      | S25 |
| 21/ Preparation and NMR spectra of CB[10] <sub>2</sub> • <b>VPI-N-H</b> <sup>+</sup> <sub>3</sub> -----               | S26 |
| 22/ References -----                                                                                                  | S28 |

## Experimental Procedures

**1/ Chemical compounds.** **T-VPI** and **VPI-N** were obtained following previously described procedures.<sup>[1]</sup> D<sub>2</sub>O, TFA (deuterated trifluoroacetic acid) and DCI in D<sub>2</sub>O (3.5%) were purchased from commercial sources (Aldrich, Acros, ABCR or TCI) and used without further purification. HPLC grade water (purchased from Sigma-Aldrich) was used as deionized water. CB[8] was prepared according to a previous paper.<sup>[2]</sup> CB[10] was obtained following a previously described procedure.<sup>[3]</sup> Di-tolyl viologen (**TVT**) was obtained from a previously reported procedure.<sup>[4]</sup>

**2/ NMR measurements.** NMR measurements were recorded on Bruker AVL 300, 400 and 500 spectrometers (<sup>1</sup>H-NMR 300.13, 400.13 and 500.13 MHz and <sup>13</sup>C-NMR 100.60, and 125.75 MHz). When using D<sub>2</sub>O as the solvent (internal reference, 4.75 ppm) a watergate sequence (water suppress) was applied if necessary. Acetone was also used as internal reference for D<sub>2</sub>O solutions (ref 2.22 ppm).<sup>[5]</sup> Splitting patterns are indicated as follows: s, singlet; d, doublet; dd, doublet of doublet; t, triplet; m, multiplet. 2D NMR spectra (COSY and ROESY) were recorded using standard Bruker sequences. ROESY spectra for the CB[8]<sub>2</sub>•**T-VPI**<sub>2</sub> complex was not attempted owing to large signals in the aromatic region usually affording spectra with no cross-peaks. Similarly, the ROESY of the CB[10]<sub>2</sub>•**VPI-N**<sub>3</sub> complex was not recorded for the same reason, but ROESY was obtained for this complex in acidic conditions (sharper peaks compared to neutral conditions, see Figure S33).

**3/ ITC measurements.** Isothermal Titration Calorimetry (ITC) was performed on a Malvern MicroCal PEAQ-ITC at 25 °C. A 1 mM stock solution of **VPI-N** (syringe) was diluted in HPLC grade water (cell) for investigating dimer formation. Results were analyzed using the Malvern MicroCal PEAQ-ITC Analysis Software 1.1.0.1262 considering the dissociation model. For **T-VPI** (1 mM, syringe), titrations were performed with CB[8] solutions at 40 μM in HPLC grade water (cell). For **VPI-N** (1 mM, syringe), titrations were performed with CB[8] solutions at 40 μM in HPLC grade water (cell). Results were analyzed using the Malvern MicroCal PEAQ-ITC Analysis Software 1.1.0.1262 considering the one set of sites binding model. The reduced Chi square value [(kJ/mol)<sup>2</sup>] for each titration is indicated hereafter: **VPI-N** dilution: 0.036, **T-VPI** with CB[8]: 0.353, **VPI-N** with CB[8]: 0.385.

**4/ Absorption and fluorescence spectroscopies.** UV-visible absorption spectra were recorded in spectrophotometric grade water (ca. 10<sup>-5</sup> M) on a VARIAN CARY 50 SCAN spectrophotometer at room temperature with a 300 nm/min scan rate. Emission spectra were measured using a Horiba-Jobin Yvon Fluorolog-3 spectrofluorimeter equipped with a three-slit double-grating excitation and a spectrograph emission mono-chromator with dispersions of 2.1 nm.mm<sup>-1</sup> (1200 grooves per mm). A 450 W xenon continuous wave lamp provided excitation. The luminescence of diluted solutions was detected at right angle using 10 mm quartz cuvettes.

Excitation: the luminescence of diluted solutions was detected at right angle using 10 mm quartz cuvettes. Fluorescence quantum yields Φ were measured in diluted absolute ethanol solution with an optical density lower than 0.1 using the following equation:

$$\frac{\Phi_x}{\Phi_r} = \left( \frac{A_r(\lambda)}{A_x(\lambda)} \right) \left( \frac{n_x^2}{n_r^2} \right) \left( \frac{D_x}{D_r} \right)$$

where A is the absorbance at the excitation wavelength (λ), n the refractive index and D the integrated intensity. "r" and "x" stand for reference and sample. The fluorescence quantum yields were measured relative to anthracene in ethanol (Φ = 27%). Excitation of reference and sample compounds was performed at the same wavelength, *ie.* 290 nm for **T-VPI** and 310 nm for **VPI-N** and **T-V-T**.



## 6/ <sup>1</sup>H NMR spectrum of VPI-N

<sup>1</sup>H NMR (500 MHz, D<sub>2</sub>O) δ 8.95 (d, *J* = 5.0 Hz, 2H, **H5**), 8.76 (d, *J* = 5.9 Hz, 2H, **H2**), 8.19 (d, *J* = 5.0 Hz, 2H, **H4**), 8.13 (d, *J* = 5.6 Hz, 2H, **H3**), 8.08 (d, *J* = 8.0 Hz, 2H, **H7**), 7.90 (br s, 2H, **H8**), 7.73 (br s, 2H, **H9** or **H10**), 7.67 (d, *J* = 8.2 Hz, 2H, **H6**), 7.18 (m, 2H, **H9** or **H10**), 4.31 (s, 3H, **H1**).

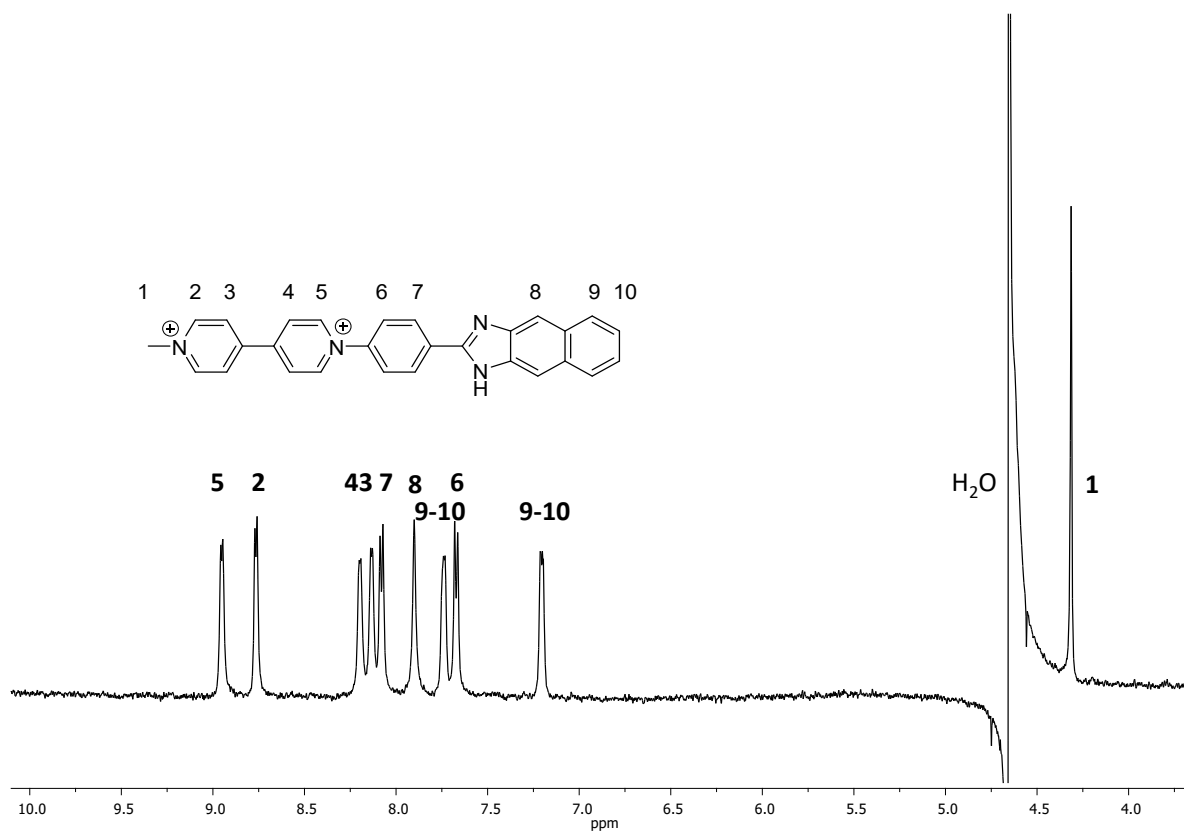

**Figure S2.** <sup>1</sup>H NMR spectrum (300 MHz, D<sub>2</sub>O, 298 K, 0.33 M) of compound VPI-N.

7/ NMR and ITC study of VPI-N dimerization

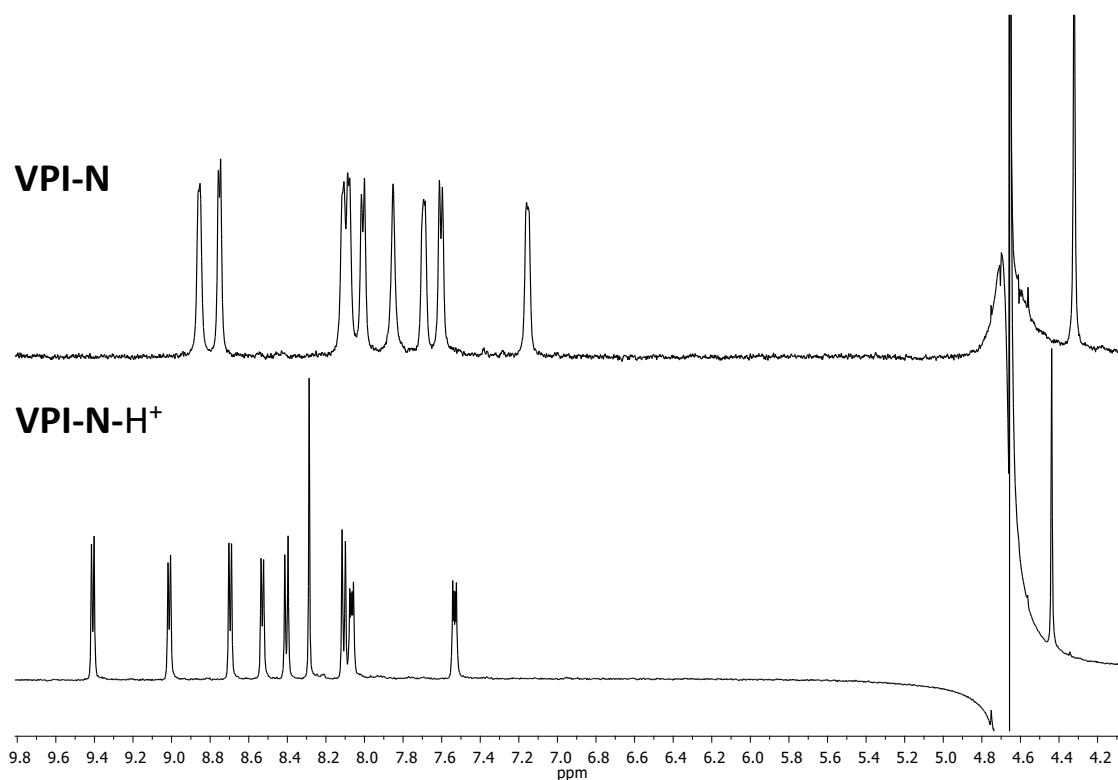

Figure S3. <sup>1</sup>H NMR spectra of VPI-N alone in D<sub>2</sub>O (top) and in the presence of TFA (bottom).

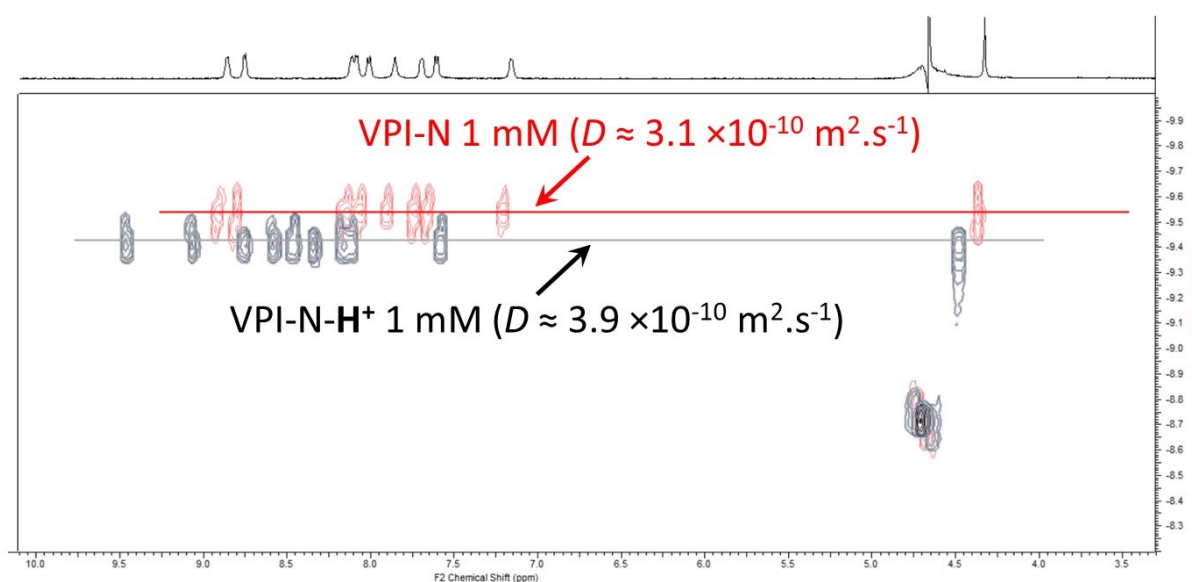

Figure S4. DOSY NMR spectra (500 MHz, D<sub>2</sub>O, 300 K) of VPI-N in D<sub>2</sub>O (top) and in the presence of deuterated-TFA (bottom).

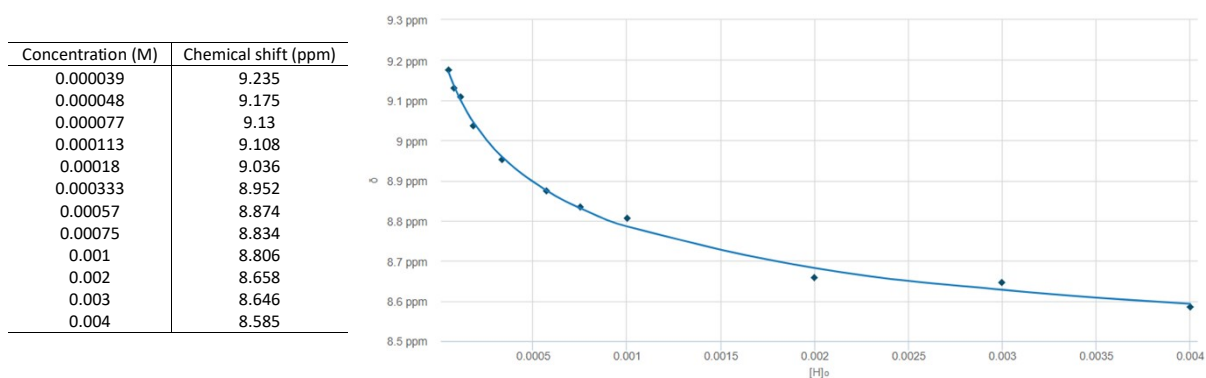

**Figure S5.** Evolution of the chemical shift of the  $^1\text{H}$  NMR signal of proton H5 in  $\text{D}_2\text{O}$  (500 MHz, 300 K) as a function of **VPI-N** concentration (in  $\text{mol}\cdot\text{L}^{-1}$ ).

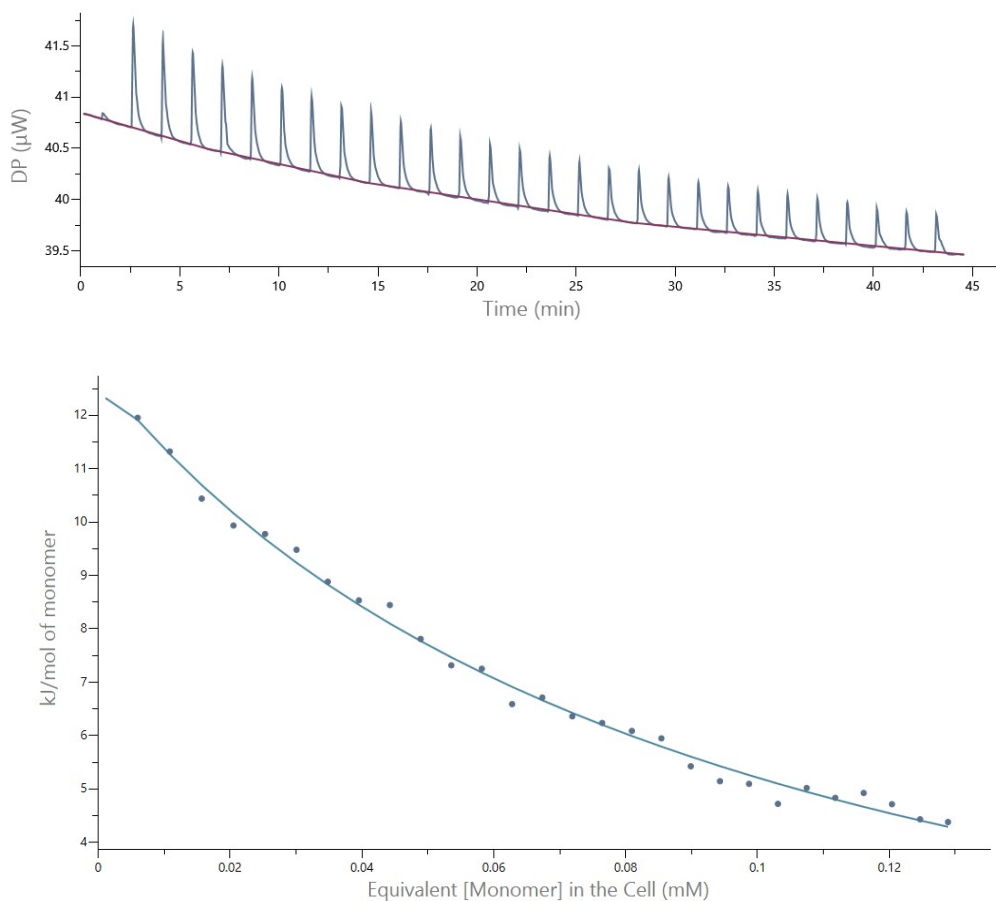

**Figure S6.** ITC thermogram corresponding to the dilution of a 1 mM solution of **VPI-N** in water.

**8/  $^1\text{H}$  NMR titration of T-VPI with CB[8]**

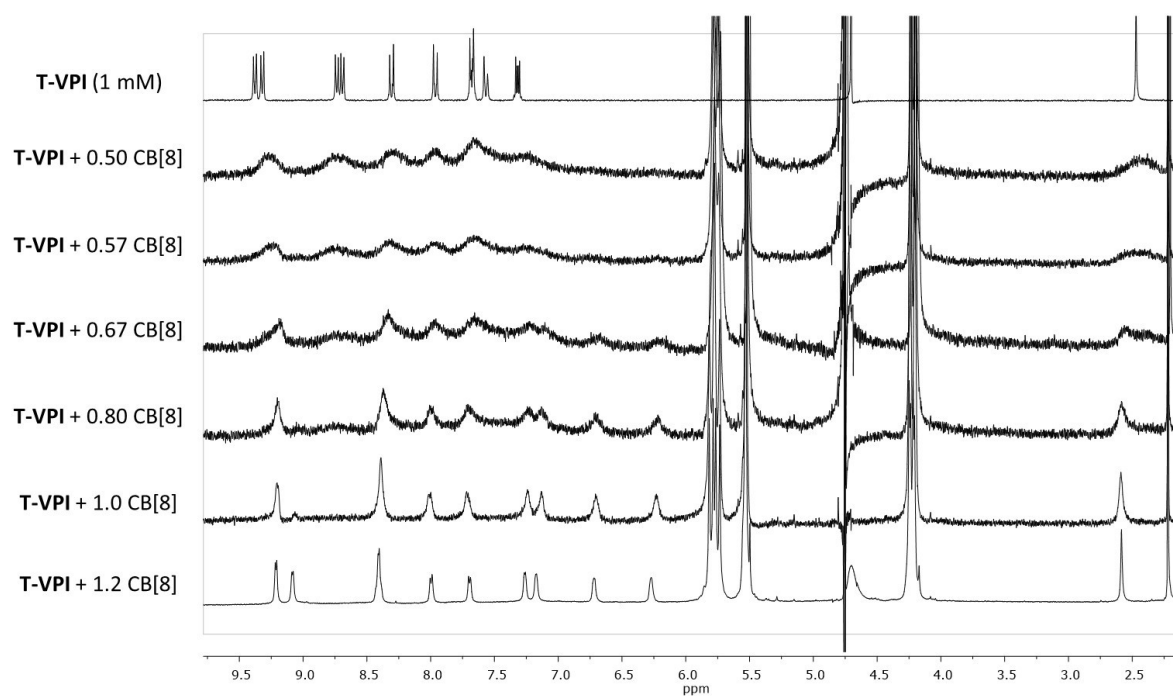

**Figure S7.**  $^1\text{H}$  NMR (500 MHz,  $\text{D}_2\text{O}$ , 298 K, 0.45 mM) of compound  $\text{CB}[8]_2 \cdot \text{T-VPI}_2$ .

**9/  $^1\text{H}$  NMR titration of VPI-N with CB[8]**

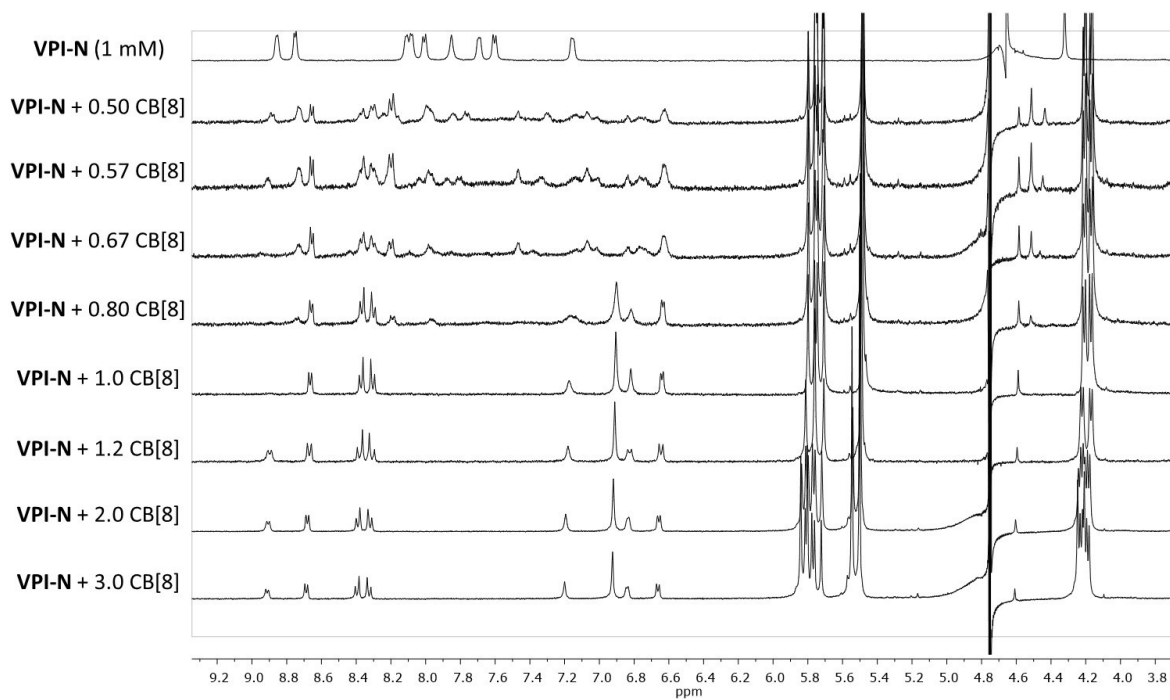

**Figure S8.**  $^1\text{H}$  NMR (500 MHz,  $\text{D}_2\text{O}$ , 298 K, 0.45 mM) of compound  $\text{CB}[8]_2 \cdot \text{VPI-N}_2$ .

## 10/ Preparation and NMR spectra of $\text{CB}[8]_2 \bullet \text{T-VPI}_2$

A 0.45 mM solution of  $\text{CB}[8]_2 \bullet \text{T-VPI}_2$  was prepared from a mixture of 0.84 mg of solid  $\text{CB}[8]$  ( $6.3 \times 10^{-7}$  mol, 1.2 equiv.), 263  $\mu\text{L}$  of a 2 mM stock solution of **T-VPI** ( $5.3 \times 10^{-7}$  mol in  $\text{D}_2\text{O}$  and 370  $\mu\text{L}$  of  $\text{D}_2\text{O}$ ). Acetone was used as internal reference (2.22 ppm).

According to the integral value of signals **H5** (9.19 ppm,  $I = 4.00$ ) and the integral value of  $\text{CB}[8]$  protons (5.83-5.69 ppm,  $I = 44.20$ ), a  $\text{CB}[8]/\text{T-VPI}$  ratio of 2.76/2 is determined.

$^1\text{H}$  NMR (500 MHz,  $\text{D}_2\text{O}$ )  $\delta$  9.19 (br s, 4H, **H5**), 9.05 (br s, 4H, **H2**), 8.38 (br s, 8H, overlapped signals of **H6** and **H7**), 8.01 (br s, 4H, **Hy**), 7.68 (br s, 4H, **Hx**), 7.22 (s, 4H, **H4**), 7.11 (s, 4H, **H3**), 6.69 (s, 4H, **H8** or **H9**), 6.21 (s, 4H, **H8** or **H9**), 5.83 – 5.69 (m, 32H,  $\text{CB}[8]$ ), 5.52 (s, 32H,  $\text{CB}[8]$ ), 4.17 (app t,  $J = 37.3$  Hz, 32H,  $\text{CB}[8]$ ), 2.59 (br s, 6H, **H1**), 2.22 (acetone, ref).

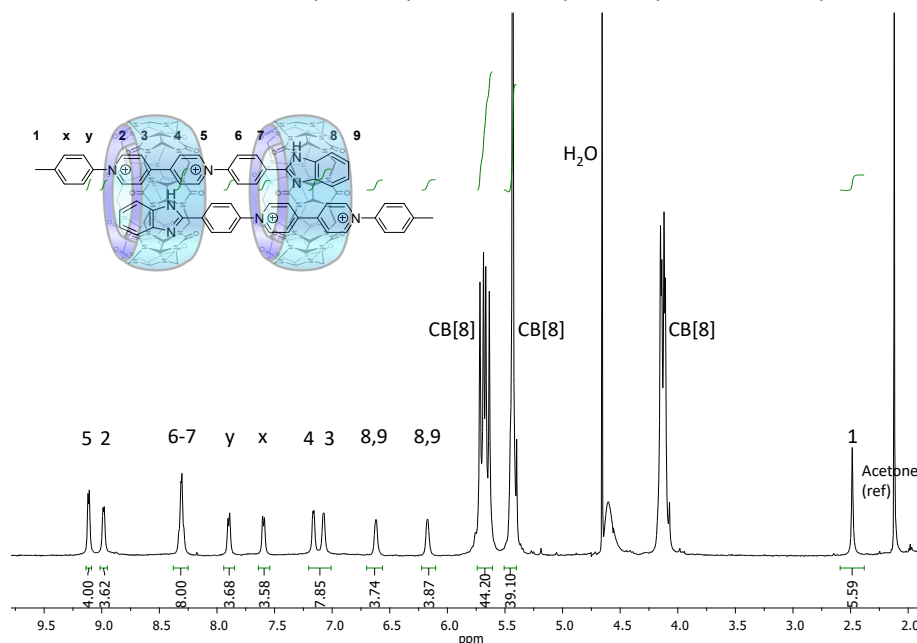

**Figure S9.**  $^1\text{H}$  NMR (500 MHz,  $\text{D}_2\text{O}$ , 298 K, 0.45 mM) of compound  $\text{CB}[8]_2 \bullet \text{T-VPI}_2$ .

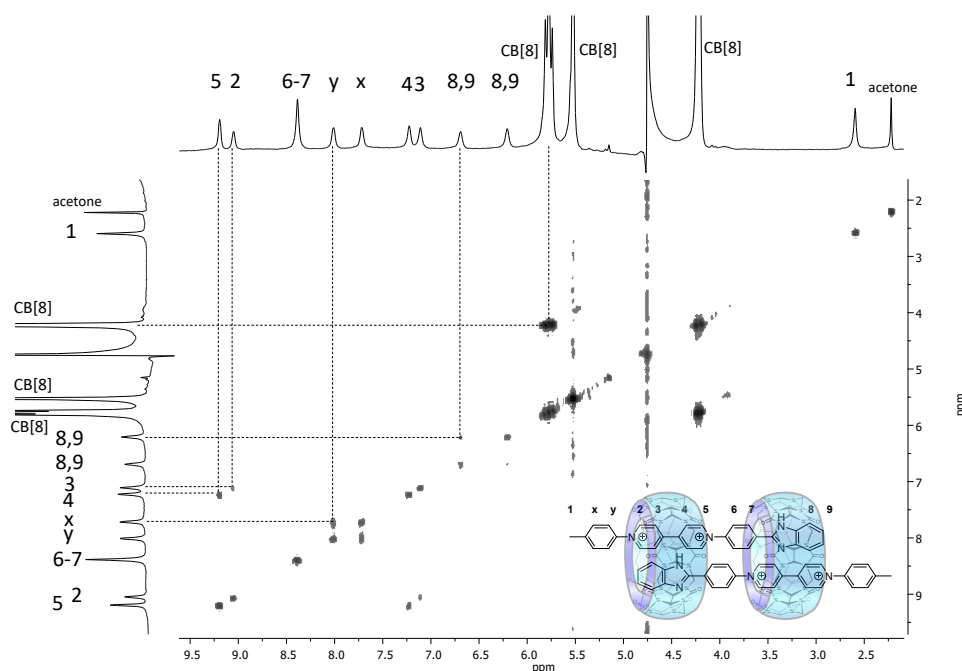

**Figure S10.** COSY NMR (500 MHz,  $\text{D}_2\text{O}$ , 298 K, 0.45 mM) of compound  $\text{CB}[8]_2 \bullet \text{T-VPI}_2$ .



## 11/ Preparation and NMR spectra of CB[8]<sub>2</sub>•VPI-N<sub>2</sub>

A 0.45 mM solution of CB[8]<sub>2</sub>•VPI-N<sub>2</sub> was prepared from a mixture of 0.74 mg of solid CB[8] ( $5.6 \times 10^{-7}$  mol, 1.2 equiv.), 115  $\mu$ L of a 4 mM stock solution of VPI-N ( $4.6 \times 10^{-7}$  mol) in D<sub>2</sub>O and 440  $\mu$ L of D<sub>2</sub>O. Acetone was used as internal reference (2.22 ppm).

According to the integral value of signals **H5** (8.90 ppm, I = 4.00) and the integral value of CB[8] protons (5.75 ppm, I = 37.82), a CB[8]/VPI-N ratio of 2.36/2 is determined.

<sup>1</sup>H NMR (500 MHz, D<sub>2</sub>O)  $\delta$  8.90 (d,  $J$  = 5.9 Hz, 4H, **H5**), 8.68 (d,  $J$  = 6.3 Hz, 4H, **H2**), 8.39 (d,  $J$  = 8.4 Hz, 4H, **H6** or **H7**), 8.32 (d,  $J$  = 8.4 Hz, 4H, **H6** or **H7**), 7.19 (s, 4H, **H8**), 6.91 (br s, 8H, overlapped signals of **H9** and **H10**), 6.82 (d,  $J$  = 6.1 Hz, 4H, **H4**), 6.65 (d,  $J$  = 6.2 Hz, 4H, **H3**), 5.75 (dd,  $J$  = 26.9, 15.4 Hz, 32H, CB[8]), 5.49 (s, 32H, CB[8]), 4.60 (s, **H1**), 4.19 (dd,  $J$  = 15.4, 6.3 Hz, 32H, CB[8]), 2.22 (acetone, ref).

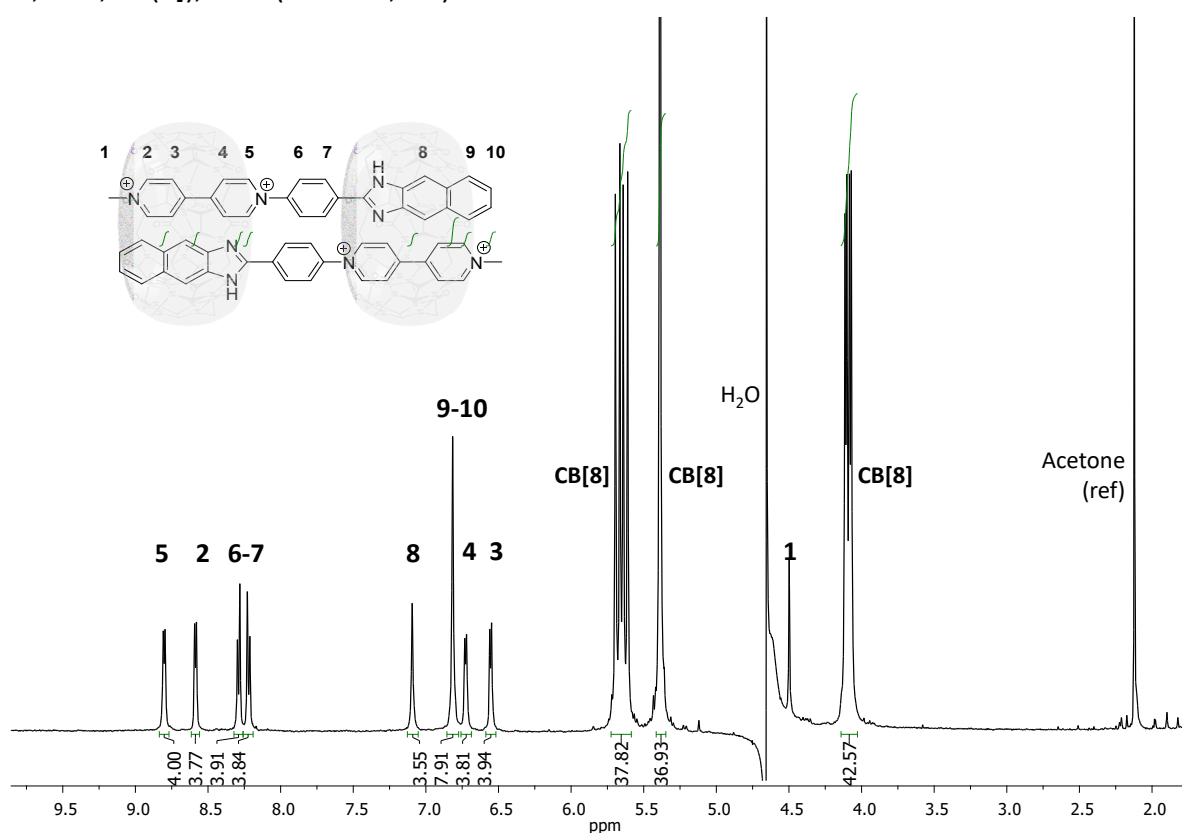

**Figure S11.** <sup>1</sup>H NMR spectrum (500 MHz, D<sub>2</sub>O, 298 K, 0.45 mM) of compound CB[8]<sub>2</sub>•VPI-N<sub>2</sub>.

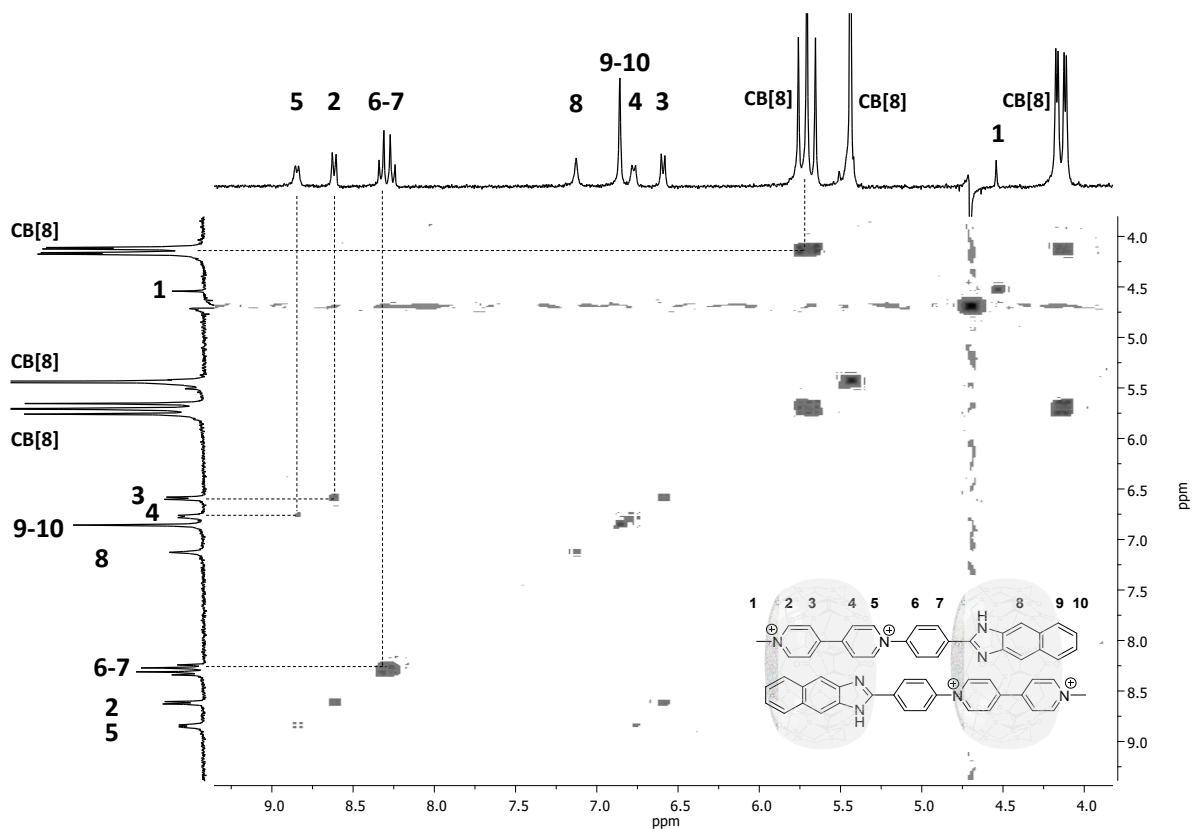

**Figure S12.** COSY NMR (300 MHz, D<sub>2</sub>O, 298 K, 0.45 mM) of compound CB[8]<sub>2</sub>•VPI-N<sub>2</sub>.

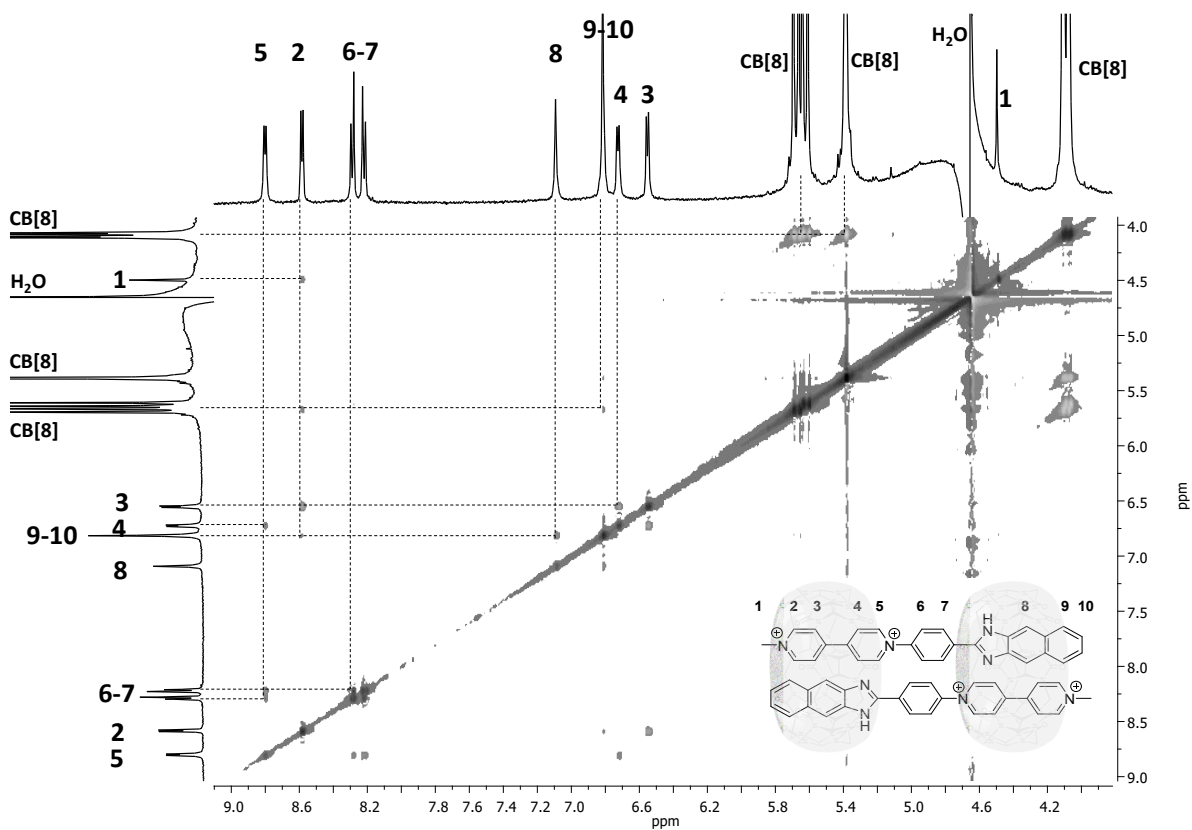

**Figure S13.** ROESY NMR (500 MHz, D<sub>2</sub>O, 298 K, 0.45 mM, mixing time: 400 ms) of compound CB[8]<sub>2</sub>•VPI-N<sub>2</sub>.

## 12/ Preparation and NMR spectra of T-VPI with CB[10]

A solution of **T-VPI** with CB[10] was prepared from a mixture of 0.47 mg of solid CB[10] ( $2.7 \times 10^{-7}$  mol, 1.1 equiv.), 125  $\mu$ L of a 2 mM stock solution of **T-VPI** ( $2.5 \times 10^{-7}$  mol) in D<sub>2</sub>O and 400  $\mu$ L of D<sub>2</sub>O.

<sup>1</sup>H NMR (500 MHz, D<sub>2</sub>O, 298 K, Figure S12)  $\delta$  5.8 (br s, CB[10]), 5.5 (br s, CB[10]), 4.1 (br s, CB[10]).

<sup>1</sup>H NMR (500 MHz, D<sub>2</sub>O, 340 K, Figure S13)  $\delta$  8.86 (br s), 8.14 (br m), 7.81 (br s), 7.61 (br s), 7.48 – 7.16 (br m), 6.78 (br s), 5.80 (app d,  $J = 15.0$  Hz, CB[10]), 5.50 (s, CB[10]), 4.26 – 4.20 (m, CB[10]), 2.35 (br s, **H1**).

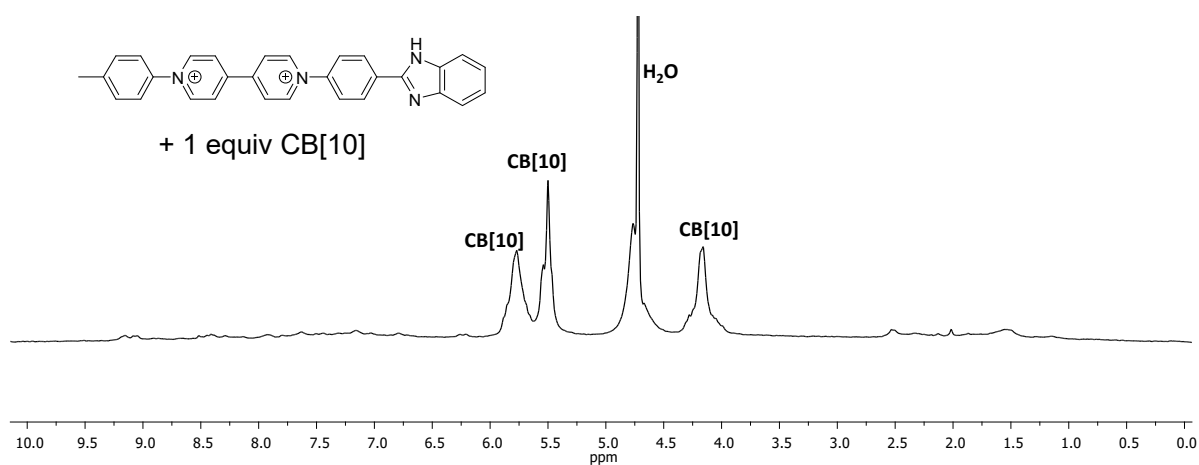

**Figure S14.** <sup>1</sup>H NMR spectrum (500 MHz, D<sub>2</sub>O, 298 K, 0.5 mM) of **T-VPI** with CB[10].

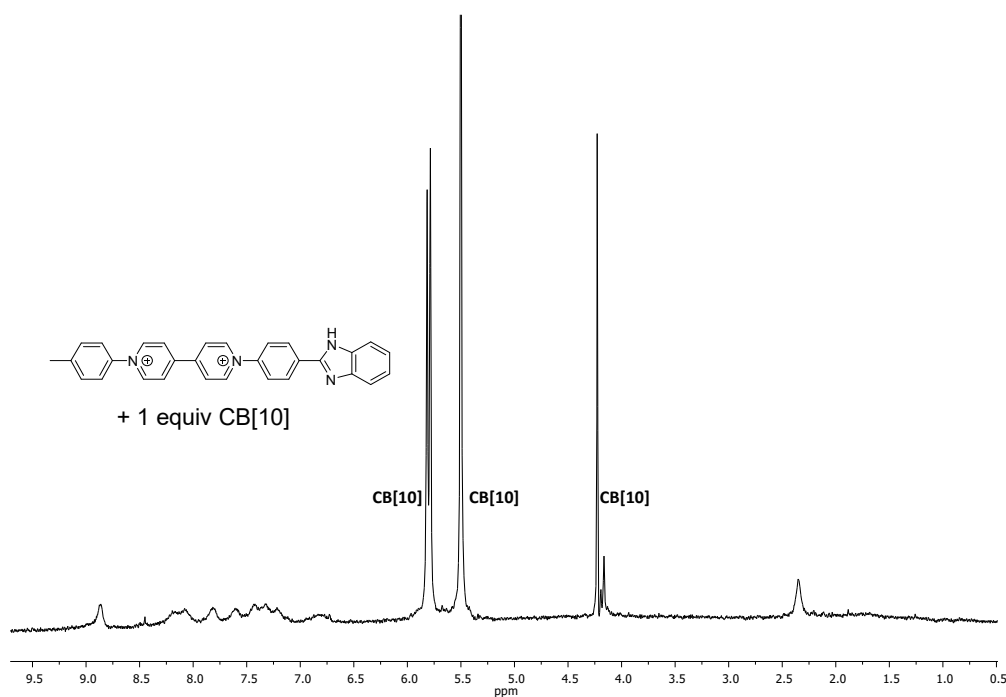

**Figure S15.** <sup>1</sup>H NMR spectrum (500 MHz, D<sub>2</sub>O, 340 K, 0.5 mM) of **T-VPI** with CB[10].

### 13/ Preparation and NMR spectra of CB[10]<sub>2</sub>•VPI-N<sub>3</sub>

A 0.17 mM solution of CB[10]<sub>2</sub>•VPI-N<sub>3</sub> was prepared from a mixture of 0.46 mg of solid CB[10] ( $2.8 \times 10^{-7}$  mol, 1.0 equiv.), 68  $\mu$ L of a 4 mM stock solution of VPI-N ( $2.8 \times 10^{-7}$  mol) in D<sub>2</sub>O and 500  $\mu$ L of D<sub>2</sub>O. Acetone was used as internal reference (2.22 ppm).

<sup>1</sup>H NMR (300 MHz, 298 K, D<sub>2</sub>O)  $\delta$  8.66 (d,  $J$  = 6.6 Hz, 4H, **H5a**), 8.61 (d,  $J$  = 6.4 Hz, 4H, **H2a**), 8.45-8.38 (m, 2H, **H5b**), 8.23 (d,  $J$  = 5.0 Hz, 2H, **H2b**), 8.15 (d,  $J$  = 8.7 Hz, 4H, **H7a**), 7.81-7.92 (m, 6H, **H7b** and **H6a**), 7.49 (d,  $J$  = 5.0 Hz, 2H, **H6b**), 6.95-7.15 (br m), 6.94-6.80 (br m), 5.78 (app ddd,  $J$  = 17.9, 17.0, 10.7 Hz, 40H, CB[10]), 5.50 (app d, 40H, CB[10]), 4.53 (br s, **H1a**), 4.47 (br s, **H1b**), 4.30-4.06 (m, 40H, CB[10]), 2.22 (acetone, ref). Signals **H3a-b**, **H4a-b**, **H8a-b**, **H9a-b** and **H10a-b** were not identified on the <sup>1</sup>H NMR spectrum at 298 K (300 or 500 MHz).

According to the integral value of signals **H5a + H5b** (8.67 ppm,  $I$  = 3.78 and 8.33 ppm,  $I$  = 1.93) and the integral value of CB[10] protons (5.92-5.69 ppm,  $I$  = 40.00), a CB[10]/VPI-N ratio of 2.1/3 is determined.

<sup>1</sup>H NMR (500 MHz, 340 K, D<sub>2</sub>O)  $\delta$  8.67 (d,  $J$  = 6.3 Hz, 4H, **H5a**), 8.52 (d,  $J$  = 6.1 Hz, 4H, **H2a**), 8.33 (d,  $J$  = 5.9 Hz, 2H, **H5b**), 8.18 (d,  $J$  = 8.4 Hz, 4H, **H7a**), 8.14 (d,  $J$  = 6.3 Hz, 2H, **H2b**), 7.87 (two d,  $J$  = 11.6, 8.7 Hz, 6H, overlapped signals of **H7b** and **H6a**), 7.54 (d,  $J$  = 8.4 Hz, 2H, **H6b**), 7.08 (d,  $J$  = 6.2 Hz, 4H, **H4a**), 7.00 (d,  $J$  = 6.2 Hz, 4H, **H3a**), 6.88 (d,  $J$  = 8.5 Hz, 4H, **H9a**), 6.79 (d,  $J$  = 6.0 Hz, 2H, **H4b**), 6.74 (d,  $J$  = 6.2 Hz, 2H, **H3b**), 6.59 (s, 4H, **H10a**), 5.92 – 5.69 (m, 40H, CB[10]), 5.59 – 5.40 (m, 40H, CB[10]), 4.53 (br s, **H1a**), 4.43 (br s, **H1b**), 4.18 (app ddd,  $J$  = 39.1, 19.6, 11.9 Hz, 40H, CB[10]), 2.22 (acetone, ref). Signals **H8a**, **H8b**, **H9b** and **H10b** were not identified on the <sup>1</sup>H NMR spectrum at 340 K (500 MHz).

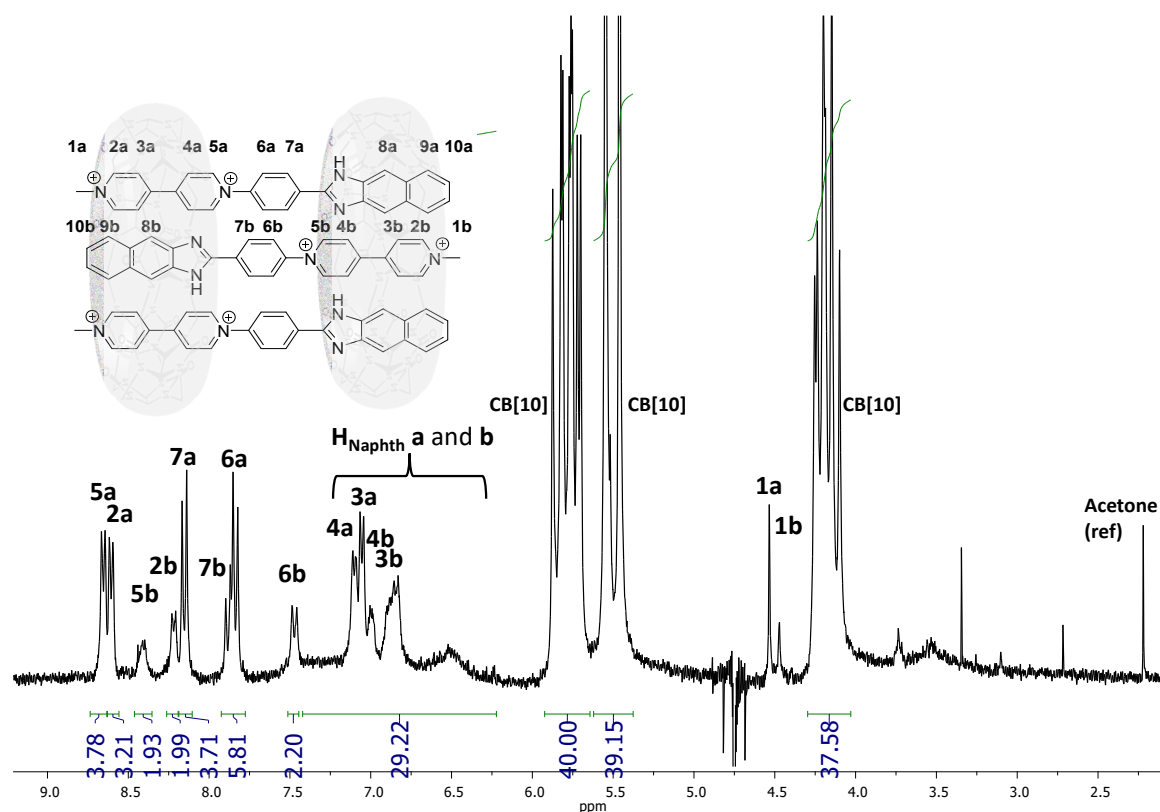

Figure S16. <sup>1</sup>H NMR spectrum (300 MHz, D<sub>2</sub>O, 298 K, 0.17 mM) of CB[10]<sub>2</sub>•VPI-N<sub>3</sub>.

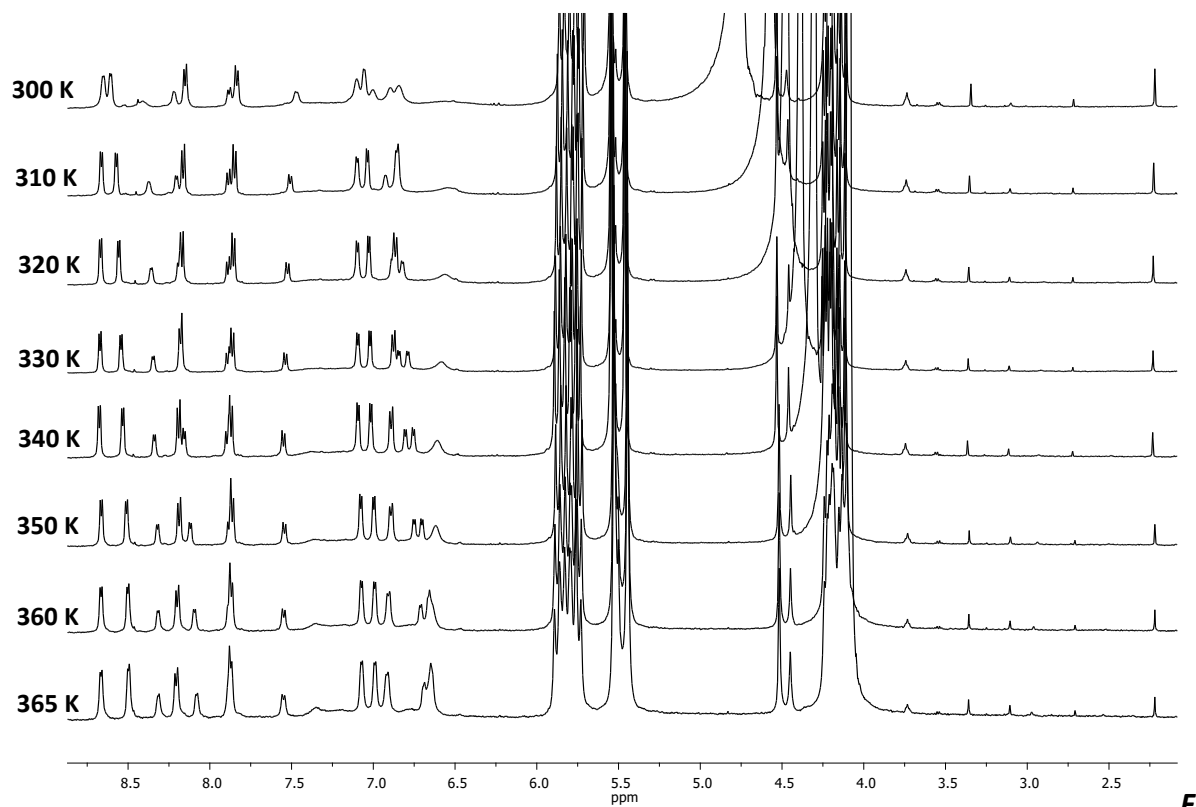

**Figure S17.**  $^1\text{H}$  NMR spectra (500 MHz,  $\text{D}_2\text{O}$ , 300-365 K, 0.17 mM, ref. acetone 2.22 ppm) of  $\text{CB}[10]_2 \bullet \text{VPI-N}_3$ .

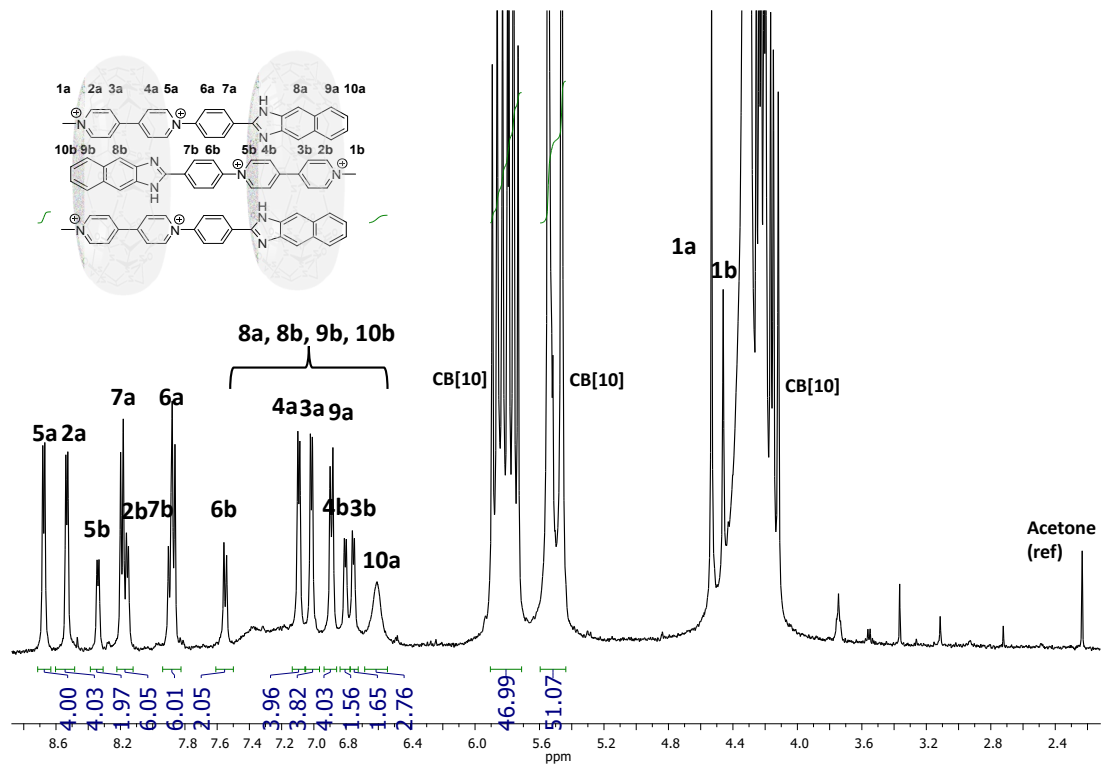

**Figure S18.**  $^1\text{H}$  NMR (500 MHz,  $\text{D}_2\text{O}$ , 340 K, 0.17 mM, ref. acetone 2.22 ppm) of  $\text{CB}[10]_2 \bullet \text{VPI-N}_3$ .

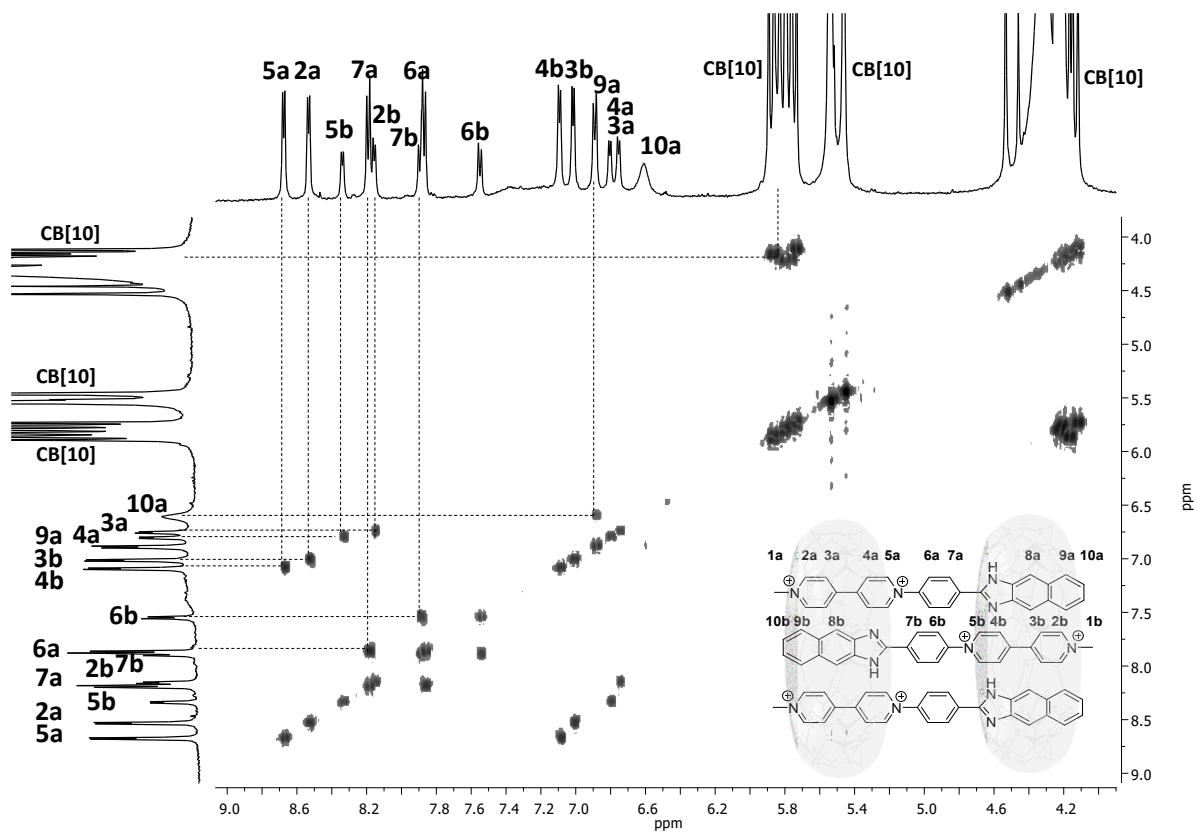

**Figure S19.** COSY NMR (500 MHz, D<sub>2</sub>O, 340 K, 0.17 mM) of CB[10]<sub>2</sub>•VPI-N<sub>3</sub>.

#### 14/ ITC study of VPI-N with CB[8]

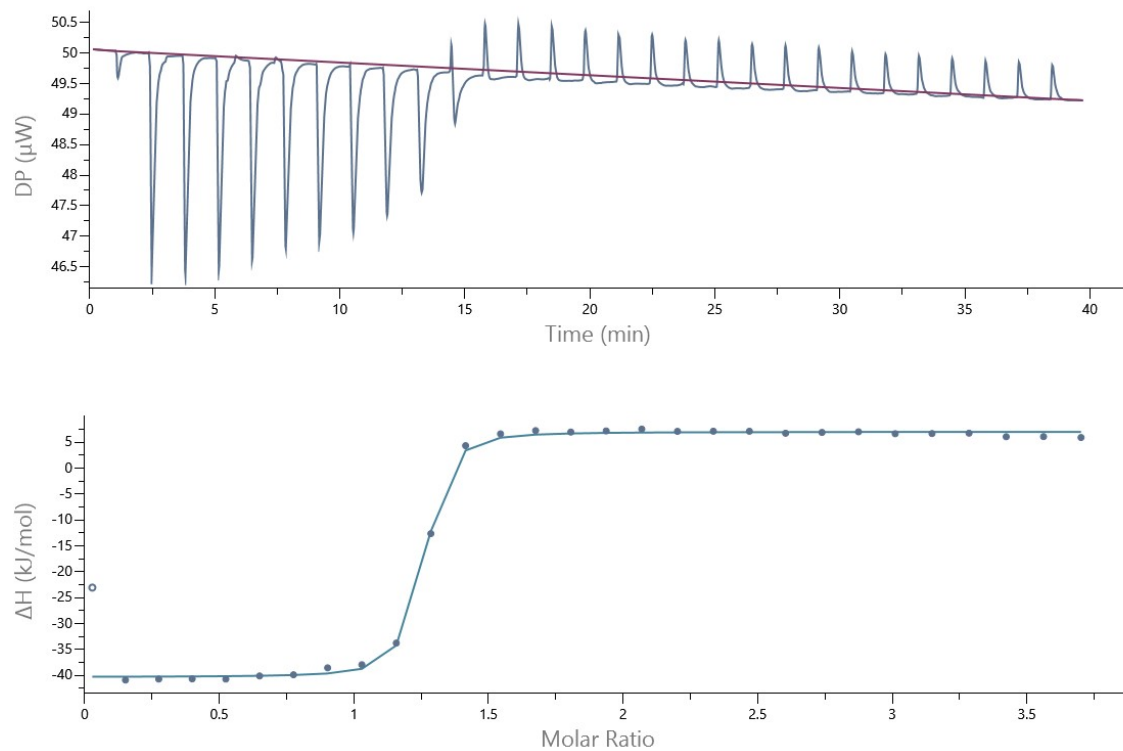

**Figure S20.** ITC thermogram corresponding to a solution of **VPI-N** titrated with CB[8] in water.

## 15/ Competition NMR for the determination of binding constants

The binding constants corresponding to the formation of  $\text{CB}[8]_2 \cdot \text{T-VPI}_2$  and  $\text{CB}[8]_2 \cdot \text{VPI-N}_2$  were evaluated using  $^1\text{H}$  NMR in the presence of a competitor guest, following the procedure of Macartney and co-workers,<sup>[6]</sup> expanded to  $\text{CB}[8]$  2:2 complexes.<sup>[7]</sup> The NMR spectra were collected at 298 K on a Bruker AC500 (64 scans) from 1 mM solutions of **T-VPI** or **VPI-N** in the presence of 1 equiv. of  $\text{CB}[8]$  and 1 equiv. of competitor in  $\text{D}_2\text{O}$  (Figures S28 to S31). The first competitor guest was 1-adamantylamine•HCl (**Ad**). The binding constant correspond to formation of the  $\text{CB}[8] \cdot \text{Ad}$  complex ( $8.19 \pm (1.75) \times 10^8 \text{ M}^{-1}$ , **R1** and **Eq1**) was reported in the literature.<sup>[8]</sup> The chemical shifts of the free **Ad** and  $\text{CB}[8] \cdot \text{Ad}$  were determined in  $\text{D}_2\text{O}$  from 1 mM solutions (Figure S29). The limiting chemical shift values,  $\Delta\delta_{\text{lim}}$ , for **Ad** and  $\text{CB}[8] \cdot \text{Ad}$  were measured according to the chemical shifts of CH protons (Table S1). Then,  $^1\text{H}$  NMR spectra of a mixture of **T-VPI** (1 equiv.), with  $\text{CB}[8]$  (1 equiv.) and **Ad** (1 equiv.) were recorded to determine the chemical shifts of CH protons of **Ad** (Table S2, **R3** and **Eq3**). Chemical resonances for free and complexed **Ad** suggest fast exchange on the NMR timescale (Figure S29). Following the method of Macartney et al,<sup>[6]</sup> the binding constant corresponding to the formation of the complex from  $\text{CB}[8]$  and **T-VPI** was calculated from the chemical shifts of the competitive spectra and  $\Delta\delta_{\text{lim}}$  (Table S1) and considering equation **Eq4**.

On the other hand, since 1-adamantylamine•HCl (**Ad**) presents a too low  $\text{CB}[8]$  binding constant compared to **VPI-N**, we used memantine (3,5-dimethyladamantylamine•HCl, **diMeAd**) as competitor to evaluate the binding constant for  $\text{CB}[8]_2 \cdot \text{VPI-N}_2$  (Figures S30-31). The binding constant of  $\text{CB}[8]$  toward **diMeAd**<sub>2</sub> is  $4.3 \times 10^{11} \text{ M}^{-1}$ .<sup>[8]</sup> Because the  $^1\text{H}$  NMR signals of free/complexed **VPI-N/diMeAd** were not clear in the aromatic and aliphatic regions (Figure S30), we evaluated the  $\text{CB}[8]_2 \cdot \text{VPI-N}_2$  binding constant from the integral values of the  $\text{CB}[8]$  at 5.540 and 5.490 ppm, assigned to  $\text{CB}[8] \cdot \text{diMeAd}$  and  $\text{CB}[8]_2 \cdot \text{VPI-N}_2$ , respectively (Figure S31). The results are presented in (Table S2).

Preparation of the **Ad/T-VPI/CB[8]** competition solution (Figures S28-29) :

A solution of **Ad/T-VPI/CB[8]** was prepared from a mixture of 0.81 mg of solid  $\text{CB}[8]$  ( $6.1 \times 10^{-7}$  mol, 1 equiv.), 304  $\mu\text{L}$  of a 2 mM solution of **T-VPI** ( $6.1 \times 10^{-7}$  mol, 1equiv.) in  $\text{D}_2\text{O}$ , 122  $\mu\text{L}$  of a 5 mM solution of **Ad** in  $\text{D}_2\text{O}$  ( $6.1 \times 10^{-7}$  mol) and 200  $\mu\text{L}$  of  $\text{D}_2\text{O}$ . Acetone was used as internal reference (2.22 ppm).

Preparation of the **diMeAd/VPI-N/CB[8]** competition solution (Figures S30-31) :

A solution of **diMeAd/VPI-N/CB[8]** was prepared from a mixture of 0.54 mg of solid  $\text{CB}[8]$  ( $4.1 \times 10^{-7}$  mol, 1 equiv.), 102  $\mu\text{L}$  of a 4 mM stock solution of **VPI-N** ( $4.1 \times 10^{-7}$  mol, 1equiv.) in  $\text{D}_2\text{O}$ , 82  $\mu\text{L}$  of a 5 mM solution of **diMeAd** in  $\text{D}_2\text{O}$  ( $4.1 \times 10^{-7}$  mol) and 250  $\mu\text{L}$  of  $\text{D}_2\text{O}$ . Acetone was used as internal reference (2.22 ppm).

**Table S1.**  $^1\text{H}$  NMR results considering the **Ad/T-VPI** competition toward  $\text{CB}[8]$ .

| Ratios of <b>Ad/T-VPI/CB[8]</b> <sup>a</sup> | $\delta_{\text{CH}}$ (Figure S29) <sup>b</sup> | $\Delta\delta$                             | % of free guest competitor | Calculated binding constant $K_a$ <sup>d</sup> |
|----------------------------------------------|------------------------------------------------|--------------------------------------------|----------------------------|------------------------------------------------|
| 1/0/0                                        | 2.134 ppm <sup>c</sup>                         | -                                          | 100                        | -                                              |
| 1/0/1                                        | 1.645 ppm <sup>c</sup>                         | $\Delta\delta_{\text{lim}} =$<br>0.489 ppm | 0                          | -                                              |
| 1/1/1                                        | 2.049 ppm                                      | $\Delta\delta_{\text{exp}} =$<br>0.085 ppm | 17                         | $2.3 \times 10^{23} \text{ M}^{-3}$            |

<sup>a</sup> 1 mM solution in  $\text{D}_2\text{O}$ ; <sup>b</sup> Chemical shift determined from NMR spectra of Figure S29 and using acetone (2.220 ppm) as internal reference; <sup>c</sup>  $\Delta\delta_{\text{lim}}$  determined from for **Ad** and  $\text{CB}[8] \cdot \text{Ad}$  spectra; <sup>d</sup> calculated from Eq4.



### Equilibrium reactions:

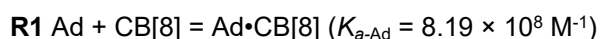

$$\text{Eq1 } K_{a-Ad} = \frac{[Ad \cdot CB[8]]}{[Ad] \cdot [CB[8]]}$$

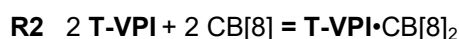

$$\text{Eq2 } K_{a-TVPI2 \cdot CB[8]2} = \frac{[TVPI2 \cdot CB[8]2]}{[TVPI]^2 \cdot [CB[8]]^2}$$

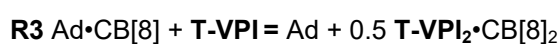

$$\text{Eq3 } K_{a-competition} = \frac{\sqrt{[TVPI2 \cdot CB[8]2]} \cdot [Ad]}{[Ad \cdot CB[8]] \cdot [TVPI]} = \frac{\sqrt{Ka - TVPI2 \cdot CB[8]2}}{Ka - Ad}$$

$$\text{Eq4 } K_{a-TVPI2 \cdot CB[8]2} = \left[ \frac{Ka - Ad \cdot \sqrt{[TVPI2 \cdot CB[8]2]} \cdot [Ad]}{[Ad \cdot CB[8]] \cdot [TVPI]} \right]^2$$

**Table S2.** <sup>1</sup>H NMR results considering the diMeAd/VPI-N competition toward CB[8].

| Ratios of diMeAd/VPI-N/CB[8] <sup>a</sup> |                                        | $\delta_{CB[8]}$       | Integral values      | % of complex | Calculated binding constant $K_a^d$     |
|-------------------------------------------|----------------------------------------|------------------------|----------------------|--------------|-----------------------------------------|
| 1/1/1                                     | CB[8]•diMeAd                           | 5.540 ppm              | 16.11 H <sup>c</sup> | 73%          | -                                       |
|                                           | CB[8] <sub>2</sub> •VPI-N <sub>2</sub> | 5.490 ppm              | 6.03 H <sup>c</sup>  | 27%          | $6.4 \times 10^{24} \text{ M}^{-3}$     |
| 0/1/1                                     | CB[8] <sub>2</sub> •VPI-N <sub>2</sub> | 5.490 ppm <sup>b</sup> | 32 H                 | 100%         | -                                       |
| 1/0/1                                     | CB[8]•diMeAd                           | 5.540 ppm <sup>b</sup> | 16 H                 | 100%         | $4.3 \times 10^{11} \text{ M}^{-1 [8]}$ |

<sup>a</sup> 1 mM solution in D<sub>2</sub>O; <sup>b</sup> Chemical shift determined from NMR spectra of Figure S31 and using acetone (2.220 ppm) as internal reference; <sup>c</sup> Integral values based on -CH<sub>3</sub> signals of diMeAd in the competition solution; <sup>d</sup> calculated from Eq4.

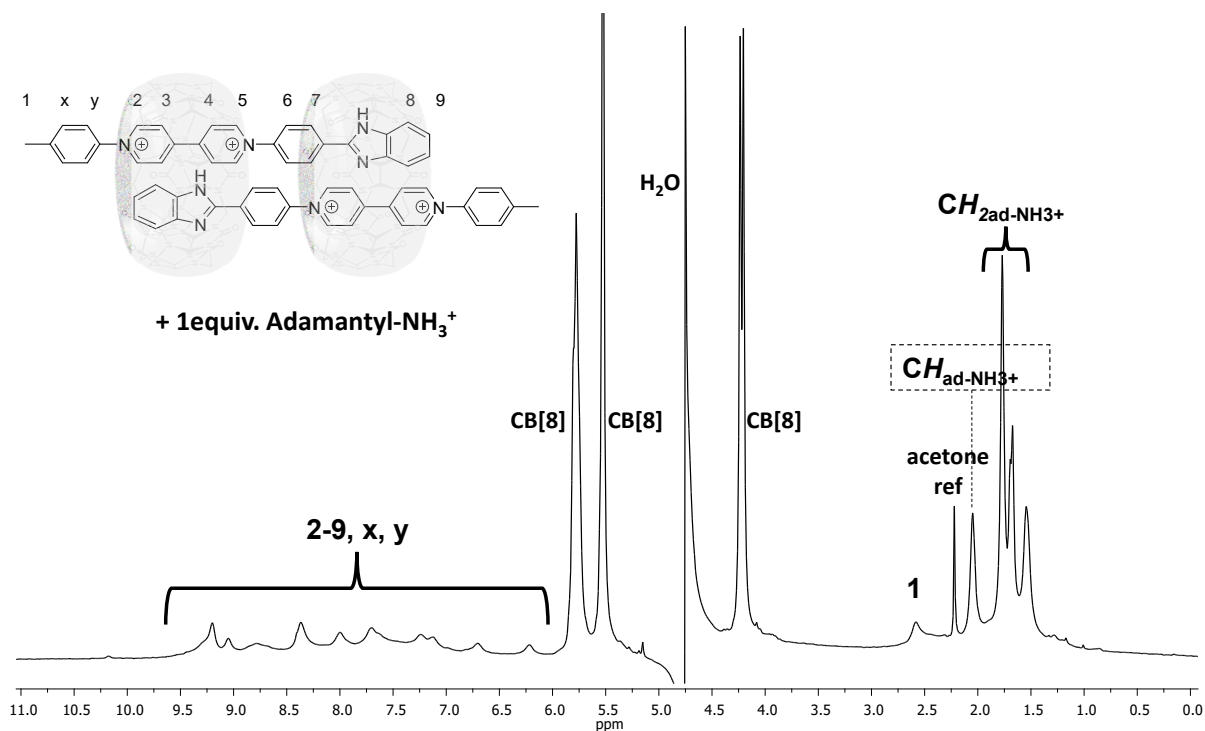

**Figure S21.**  $^1\text{H}$  NMR spectrum (500 MHz,  $\text{D}_2\text{O}$ , 298 K) of a mixture of 1 equiv. of T-VPI, 1 equiv. of CB[8] and 1 equiv. of 1-adamantylamine•HCl (Ad).

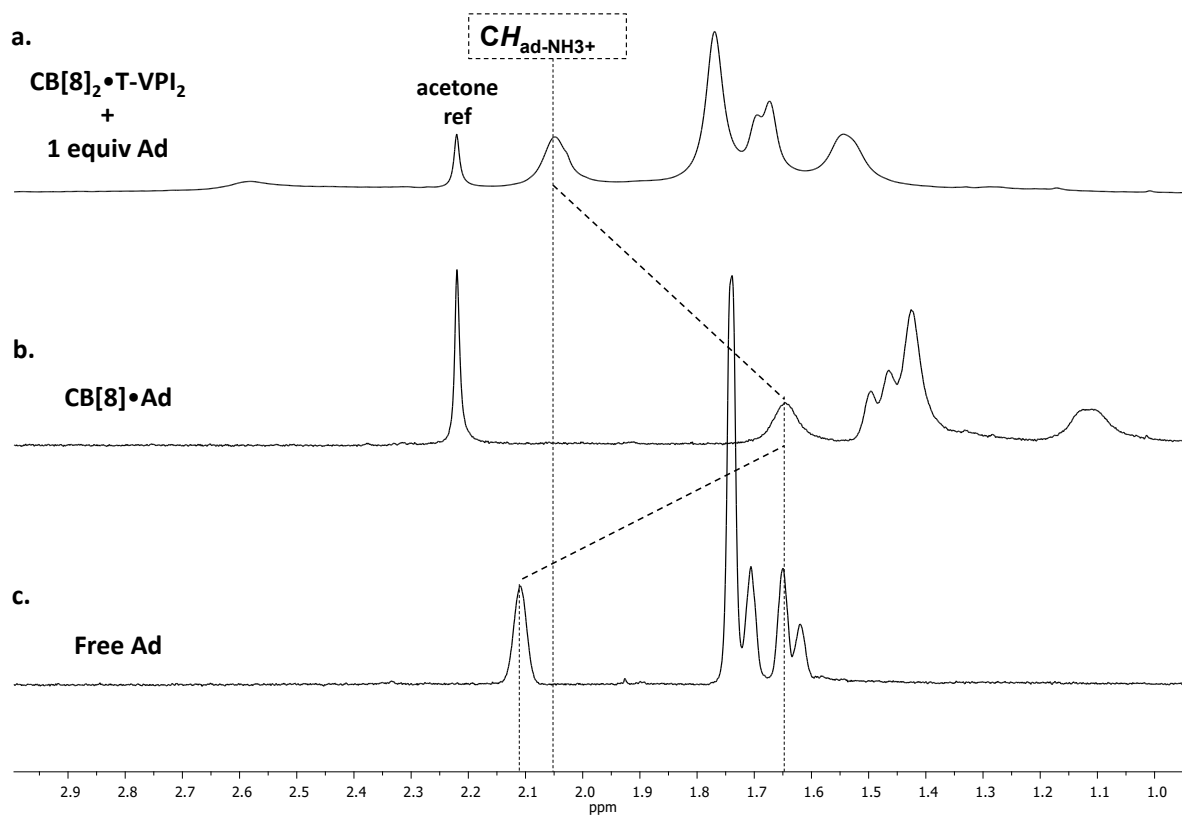

**Figure S22.**  $^1\text{H}$  NMR spectra (500 MHz,  $\text{D}_2\text{O}$ , 298 K, zoom of 0.9-3 ppm region) of: **a.** a mixture of T-VPI/CB[8]/Ad (1 equiv.), **b.** of a mixture of 1.2 equiv. of CB[8] and 1 equiv. of 1-adamantylamine•HCl (Ad), and **c.** 1-adamantylamine•HCl (Ad, 1 mM) in  $\text{D}_2\text{O}$ .

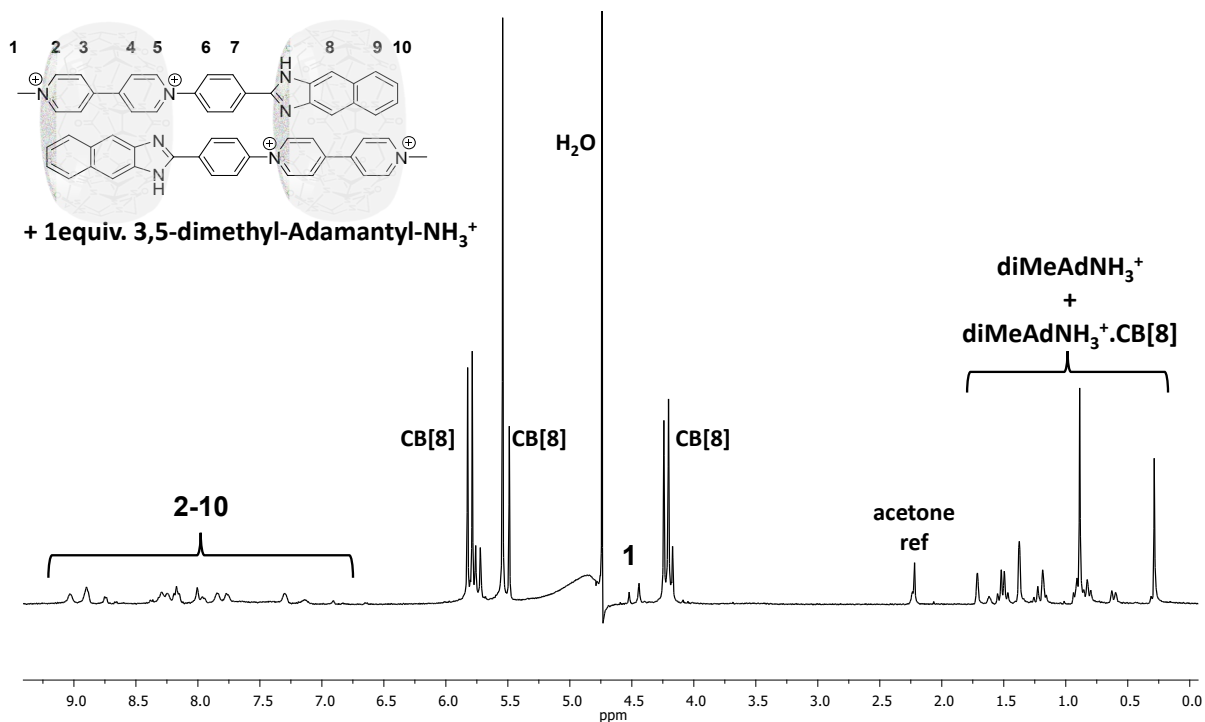

**Figure S23.**  $^1\text{H}$  NMR spectrum (500 MHz,  $\text{D}_2\text{O}$ , 298 K) of a mixture of 1 equiv. of VPI-N, 1 equiv. of CB[8] and 1 equiv. of diMeAd (1 mM).

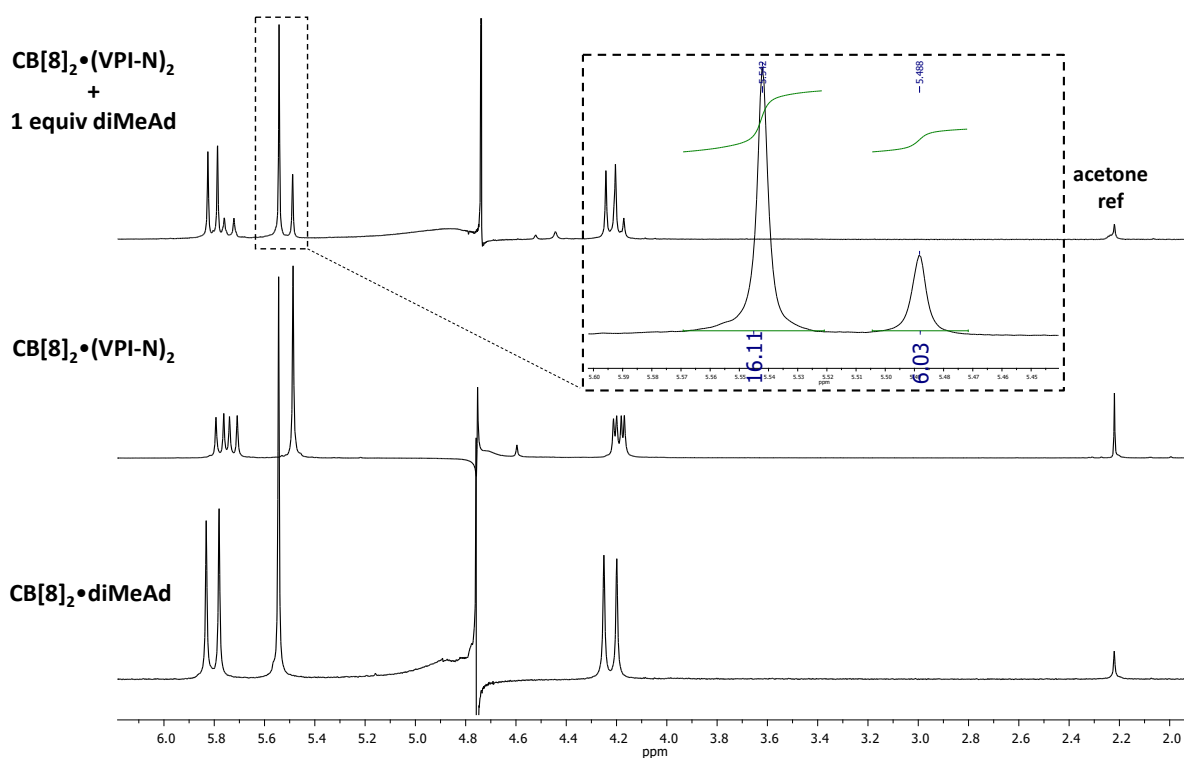

**Figure S24.**  $^1\text{H}$  NMR spectra (500 MHz,  $\text{D}_2\text{O}$ , 298 K, zoom of 2-6.2 ppm region) of: a. VPI-N/CB[8]/diMeAd (1 mM), b.  $\text{CB}[8]_2 \cdot \text{VPI-N}_2$  and c.  $\text{CB}[8] \cdot \text{diMeAd}$  (1 mM).

## 16/ UV-visible and fluorescence spectra

**Table S3.** Summary of the optical properties in water solution.

|                             | $\lambda_{\text{abs}}$ [nm] ( $\epsilon$ [ $\text{M}^{-1} \text{cm}^{-1}$ ]) | $\lambda_{\text{em}}$ [nm] | $\Phi$ [%] <sup>a</sup> |
|-----------------------------|------------------------------------------------------------------------------|----------------------------|-------------------------|
| <b>T-VPI</b>                | 344 (16000), 295 (22500), 247 (16900)                                        | 378                        | 0.88                    |
| <b>T-VPI + CB[8] (1:1)</b>  | 378 (12900), 300 (19200), 246 (15500)                                        | 381                        | 0.65                    |
| <b>T-VPI + CB[10] (2:1)</b> | 360 (15200), 296 (21500), 245 (16700)                                        | 381                        | 0.68                    |
| <b>T-VPI + CB[10] (1:1)</b> | 371 (14800), 299 (19400), 245 (15400)                                        | 385                        | 0.47                    |
| <b>VPI-N</b>                | 343 (19400), 273 (44500), 221 (38900)                                        | 424                        | 0.45                    |
| <b>VPI-N + CB[8] (1:1)</b>  | 365 (13900), 274 (32500)                                                     | 415                        | 0.36                    |
| <b>VPI-N + CB[10] (1:1)</b> | 359 (14700), 275 (33000)                                                     | 422                        | 0.11                    |
| <b>T-V-T</b>                | 338 (18100), 252 (14500)                                                     | 528                        | $\sim 1.3$ <sup>b</sup> |

<sup>a</sup> Fluorescence quantum yields in deionized water, relative to anthracene in ethanol ( $\Phi = 27\%$ ). Excitation of reference and sample compounds was performed at the same wavelength, *i.e.* 290 nm for **T-VPI** and 310 nm for **VPI-N** and **T-V-T**.

<sup>b</sup> Slightly underestimated value due to the recording conditions.

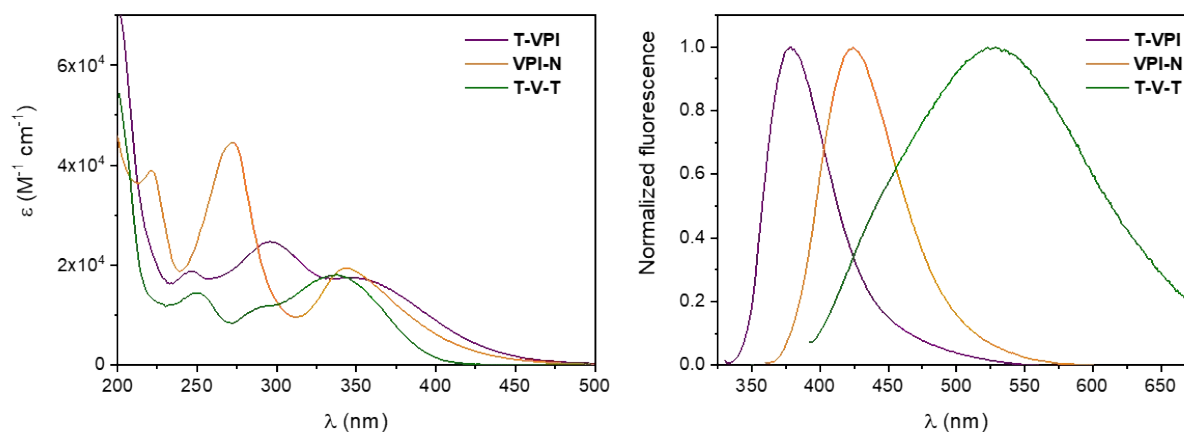

**Figure S25.** Electronic absorption (left) and normalized emission (right) spectra of compounds **T-VPI** (purple), **VPI-N** (orange) and **T-V-T** (green) in water solution (*ca.*  $10^{-5}$  M).

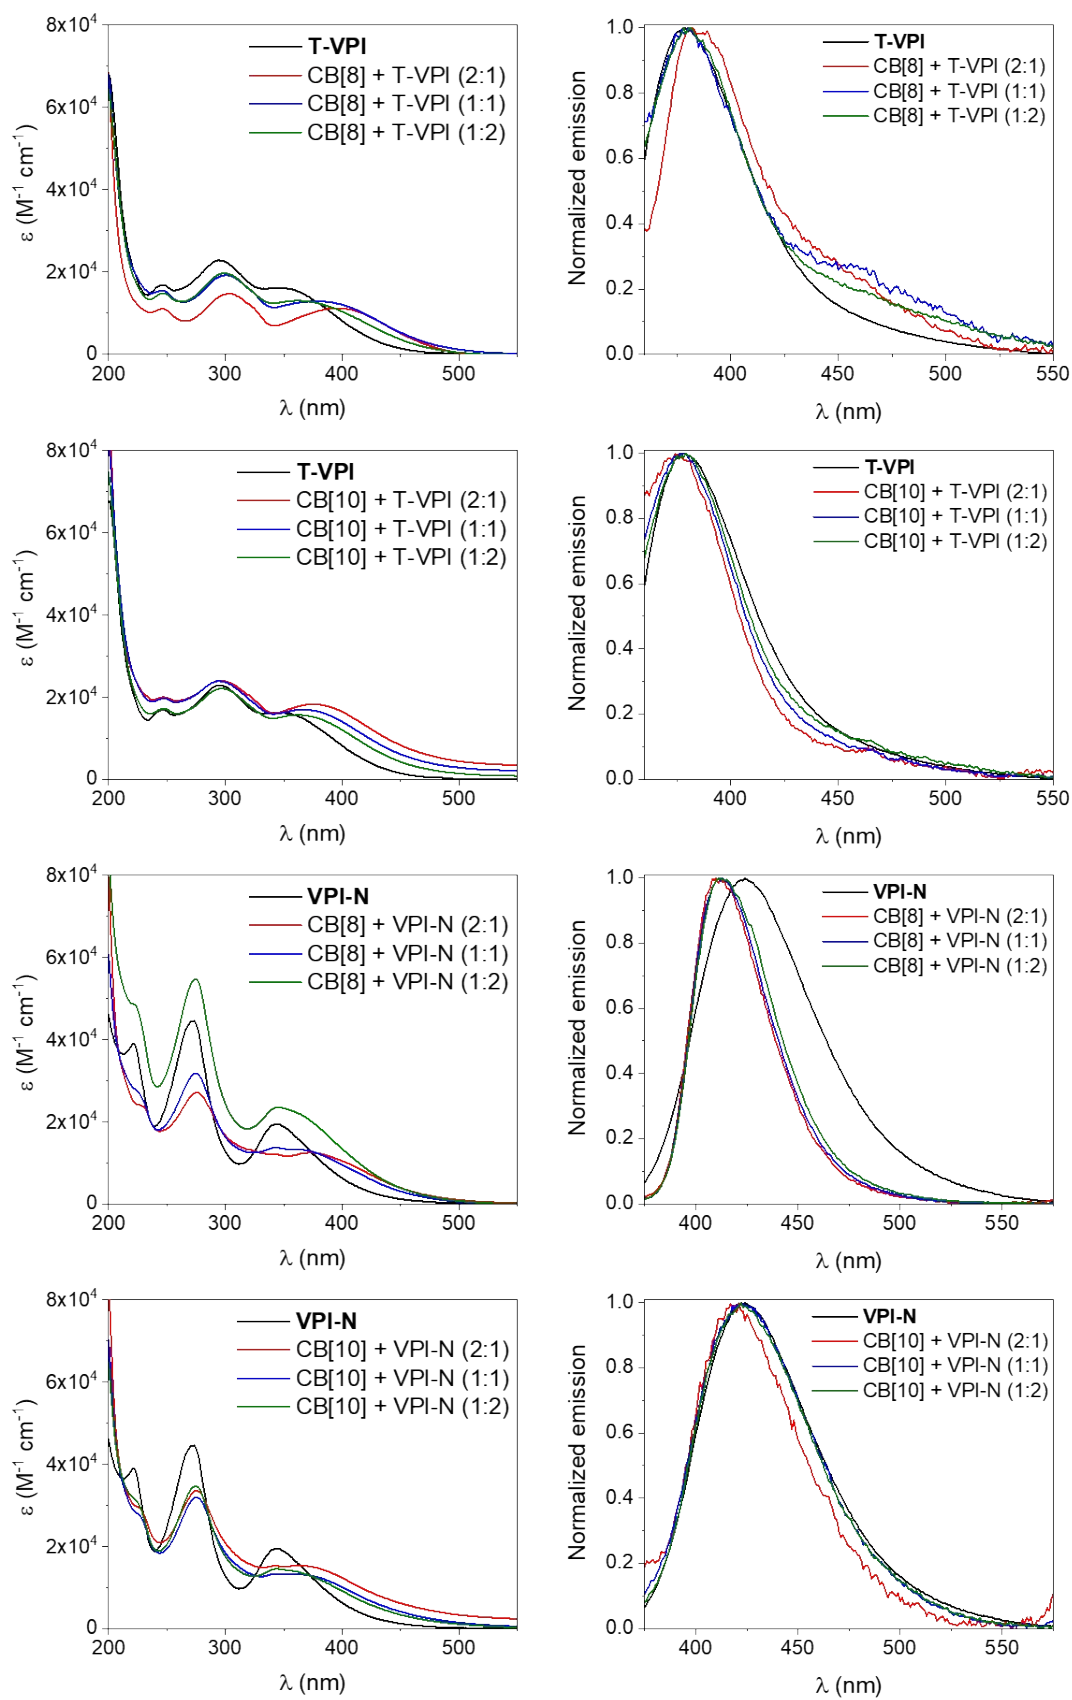

**Figure S26.** Electronic absorption (left column) and emission (right column) spectra of **T-VPI** or **VPI-N** in the presence of **CB[8]** or **CB[10]** in water ( $10^{-5}$  M).

## 17/ Preparation and NMR spectra of $\text{CB}[8]_2 \bullet \text{T-VPI}_2 \bullet \text{Ag}^+_2$

A 0.45 mM solution of  $\text{CB}[8]_2 \bullet \text{T-VPI}_2 \bullet \text{Ag}^+_2$  was prepared from a mixture of 0.64 mg of solid CB[8] ( $4.8 \times 10^{-7}$  mol, 1.2 equiv.), 200  $\mu\text{L}$  of a 2 mM stock solution of T-VPI ( $4 \times 10^{-7}$  mol) in  $\text{D}_2\text{O}$ , 40  $\mu\text{L}$  of a 0.2 M solution of  $\text{AgNO}_3$  ( $8.0 \times 10^{-6}$  mol) and 300  $\mu\text{L}$  of  $\text{D}_2\text{O}$ . Acetone was used as internal reference (2.22 ppm).

$^1\text{H}$  NMR (500 MHz,  $\text{D}_2\text{O}$ )  $\delta$  9.37 (d,  $J = 5.8$  Hz, 4H, **H5**), 9.07 (s, 4H, **H2**), 8.47 (d,  $J = 7.6$  Hz, 4H, **H7** or **H6**), 8.17 (s, 4H, **H7** or **H6**), 7.98 (d,  $J = 7.5$  Hz, 4H, **Hy** or **Hx**), 7.68 (d,  $J = 7.5$  Hz, 4H, **Hy** or **Hx**), 7.40 (s, 4H, **H4**), 7.18 (br s, 4H, **H3**), 6.67 (br s, 4H, **H8** or **H9**), 6.38 (s, 4H, **H8** or **H9**), 5.92 – 5.66 (m, 32H, CB[8]), 5.55 (s, 32H, CB[8]), 4.25 (dd,  $J = 15.3, 9.1$  Hz, 32H, CB[8]), 2.57 (s, 6H, **H1**), 2.22 (acetone, ref).

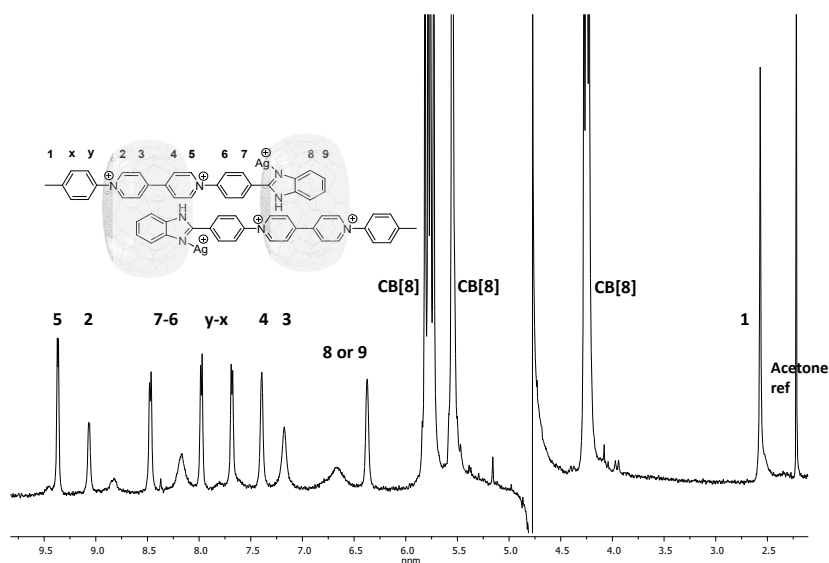

Figure S27.  $^1\text{H}$  NMR spectrum (500 MHz,  $\text{D}_2\text{O}$ , 298 K, 0.45 mM) of  $\text{CB}[8]_2 \bullet \text{T-VPI}_2 \bullet \text{Ag}^+_2$ .

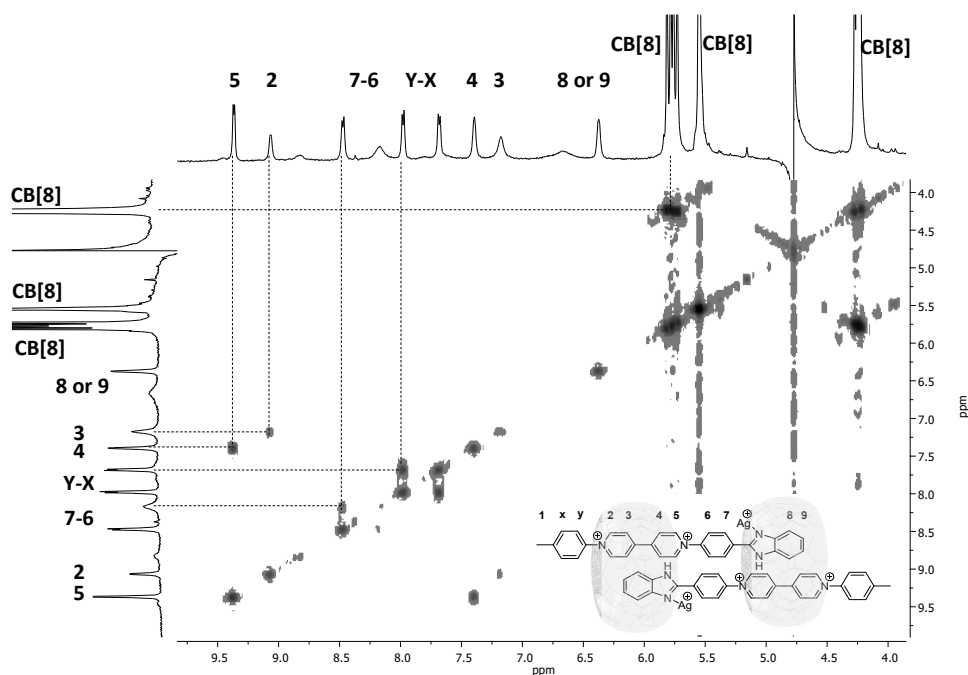

Figure S28. COSY NMR (500 MHz,  $\text{D}_2\text{O}$ , 298 K, 0.45 mM) of  $\text{CB}[8]_2 \bullet \text{T-VPI}_2 \bullet \text{Ag}^+_2$ .

## 18/ Preparation and NMR spectra of $\text{CB}[8]_2 \bullet \text{VPI-N}_2 \bullet \text{Ag}^+_2$

To 500  $\mu\text{L}$  of a 0.45 mM solution of  $\text{CB}[8]_2 \bullet \text{VPI-N}_2$  were added 50  $\mu\text{L}$  of a 0.2 M solution of  $\text{AgNO}_3$  ( $10^{-5}$  mol) in  $\text{D}_2\text{O}$ . Acetone was used as internal reference (2.22 ppm).

$^1\text{H}$  NMR (500 MHz,  $\text{D}_2\text{O}$ )  $\delta$  8.94 (d,  $J = 5.3$  Hz, 4H, **H5**), 8.75 (d,  $J = 6.3$  Hz, 4H, **H2**), 8.48 (d,  $J = 8.4$  Hz, 4H, **H6** or **H7**), 8.31 (d,  $J = 8.6$  Hz, 4H, **H6** or **H7**), 7.16 (br s, 4H, **H8**, **H9** or **H10**), 6.93 (br s, 8H, **H8**, **H9** or **H10**), 6.83 (d,  $J = 4.6$  Hz, 4H, **H4**), 6.69 (d,  $J = 6.3$  Hz, 4H, **H3**), 5.73 (app dt,  $J = 43.3, 21.6$  Hz, 32H, **CB}[8]**), 5.52 (d,  $J = 24.6$  Hz, 32H, **CB}[8]**), 4.64 (br s, **H1**), 4.20 (d,  $J = 15.4$  Hz, 32H, **CB}[8]**), 2.22 (acetone, ref).

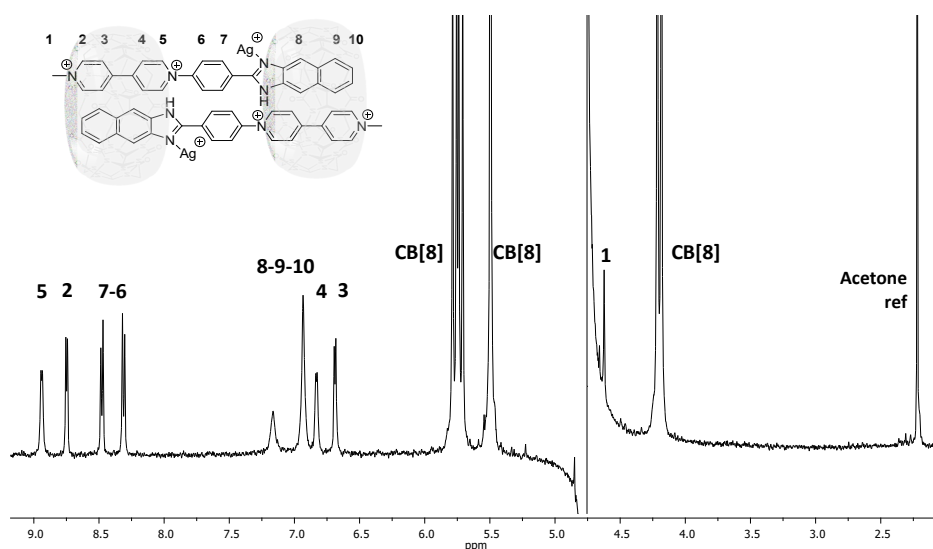

Figure S29.  $^1\text{H}$  NMR spectrum (500 MHz,  $\text{D}_2\text{O}$ , 298 K, 0.45 mM) of  $\text{CB}[8]_2 \bullet \text{VPI-N}_2 \bullet \text{Ag}^+_2$ .

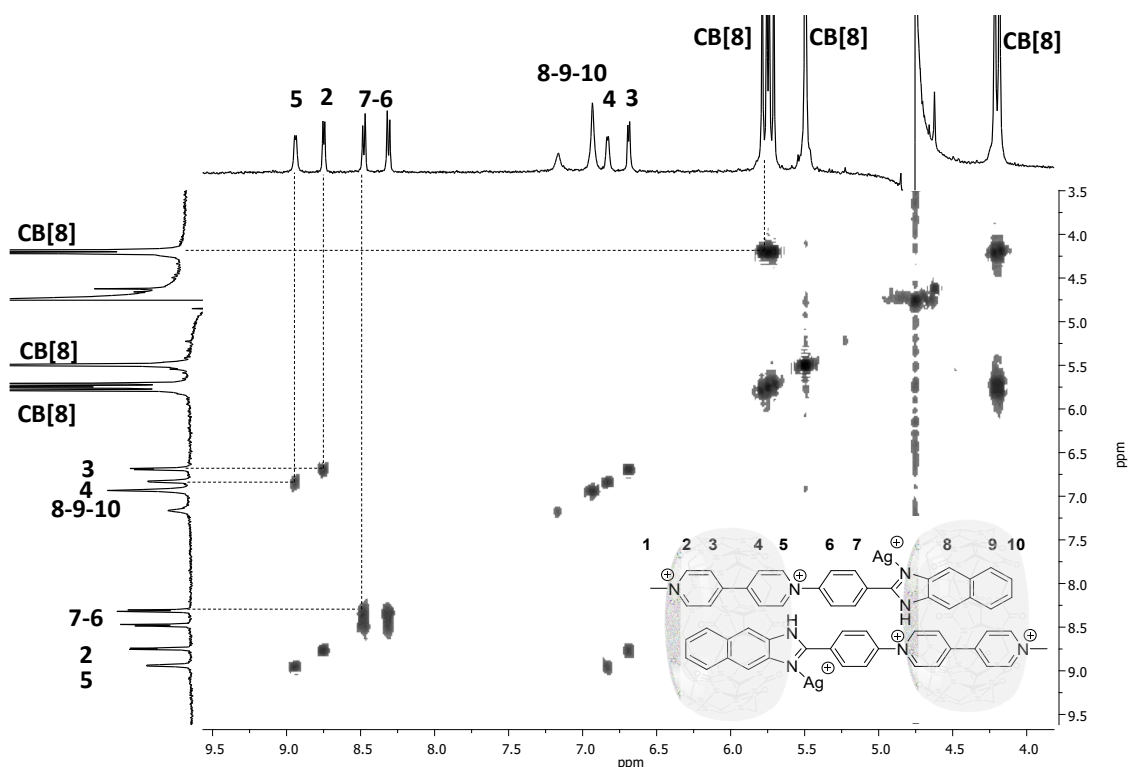

Figure S30. COSY NMR (500 MHz,  $\text{D}_2\text{O}$ , 298 K, 0.45 mM) of  $\text{CB}[8]_2 \bullet \text{VPI-N}_2 \bullet \text{Ag}^+_2$ .

## 19/ Preparation and NMR spectra of $\text{CB}[8]_2 \bullet \text{VPI-N-H}^+_2$

A 0.45 mM solution of  $\text{CB}[8]_2 \bullet \text{VPI-N-H}^+_2$  was prepared from a mixture of 0.61 mg of solid  $\text{CB}[8]$  ( $4.6 \times 10^{-7}$  mol, 1.2 equiv.), 95  $\mu\text{L}$  of a 4 mM stock solution of  $\text{VPI-N}$  ( $3.8 \times 10^{-7}$  mol) in  $\text{D}_2\text{O}$ , 20  $\mu\text{L}$  of a 0.2 M solution of  $\text{TFA}$  ( $4.0 \times 10^{-6}$  mol) and 360  $\mu\text{L}$  of  $\text{D}_2\text{O}$ . Acetone was used as internal reference (2.22 ppm).

$^1\text{H}$  NMR (500 MHz,  $\text{D}_2\text{O}$ )  $\delta$  8.95 (d,  $J = 6.4$  Hz, 4H, **H5**), 8.81 (d,  $J = 6.3$  Hz, 4H, **H2**), 8.49 (d,  $J = 8.6$  Hz, 4H, **H6** or **H7**), 8.39 (d,  $J = 8.6$  Hz, 4H, **H6** or **H7**), 7.32 (s, 4H, **H8**), 6.97 (two d,  $J = 6.3$  Hz, 8H, **H9** and **H10**), 6.87 (d,  $J = 6.5$  Hz, 4H, **H4**), 6.75 (d,  $J = 6.4$  Hz, 4H, **H3**), 5.76 (app dd,  $J = 29.5, 15.4$  Hz, 32H,  $\text{CB}[8]$ ), 5.50 (br s, 32H,  $\text{CB}[8]$ ), 4.65 (br s, **H1**), 4.22 (d,  $J = 15.3$  Hz, 32H,  $\text{CB}[8]$ ), 2.22 (acetone, ref).

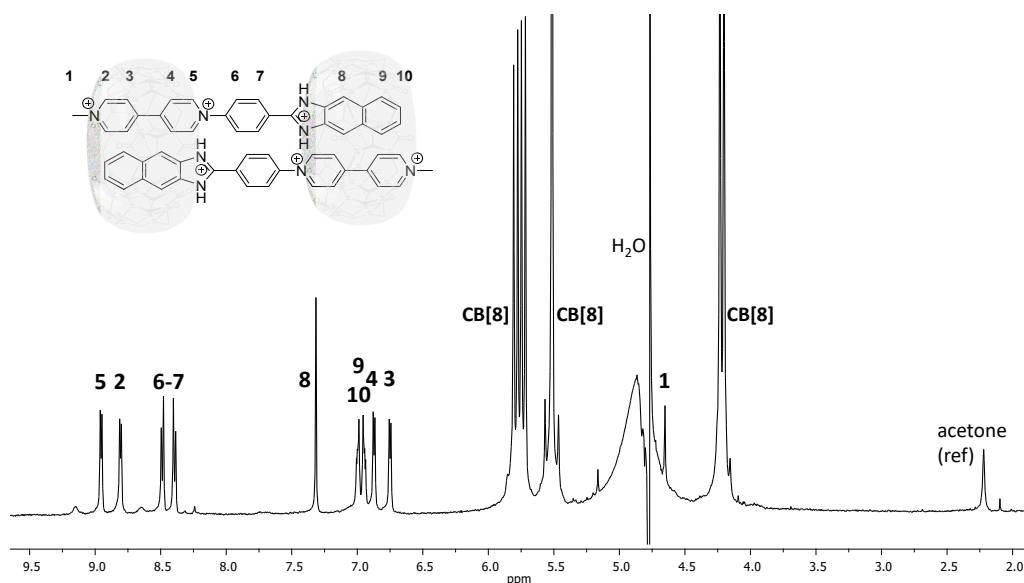

**Figure S31.**  $^1\text{H}$  NMR spectrum (500 MHz,  $\text{D}_2\text{O}$ , 298 K, 0.45 mM) of  $\text{CB}[8]_2 \bullet \text{VPI-N-H}^+_2$ .

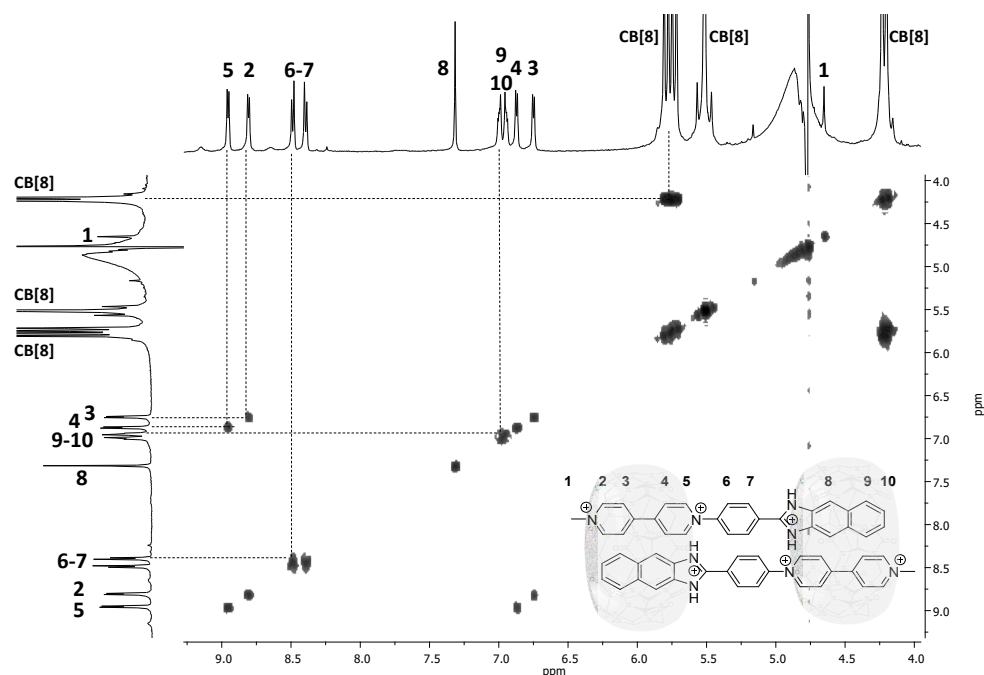

**Figure S32.** COSY NMR (500 MHz,  $\text{D}_2\text{O}$ , 298 K, 0.45 mM) of  $\text{CB}[8]_2 \bullet \text{VPI-N-H}^+_2$ .



## 20/ Preparation and NMR spectra of CB[8]<sub>2</sub>•T-VPI<sub>2</sub> with TFA

A solution of T-VPI/CB[8]/TFA was prepared from a mixture of 0.66 mg of solid CB[8] ( $5.0 \times 10^{-7}$  mol, 1.2 equiv.), 205  $\mu$ L of a 2 mM stock solution of T-VPI ( $4.1 \times 10^{-7}$  mol, 1equiv.) in D<sub>2</sub>O, 20  $\mu$ L of a 0.2 M solution of TFA in D<sub>2</sub>O ( $4.0 \times 10^{-6}$  mol) and 280  $\mu$ L of D<sub>2</sub>O. Acetone was used as internal reference (2.22 ppm).

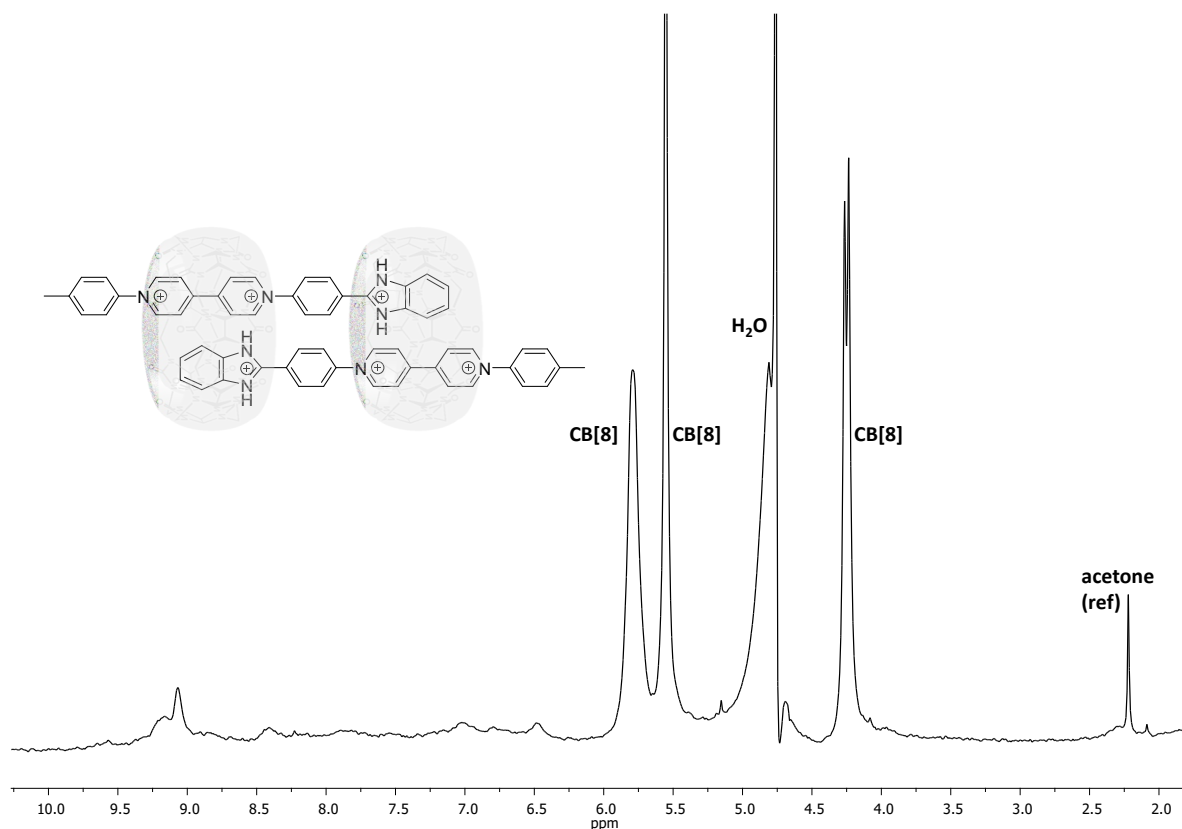

**Figure S33.** <sup>1</sup>H NMR spectrum (500 MHz, D<sub>2</sub>O, 298 K, 1 mM) of 1 equiv. of T-VPI, with 1.2 equiv. of CB[8] and 10 mM of TFA.

## 21/ Preparation and NMR spectra of $\text{CB}[10]_2 \bullet \text{VPI-N-H}^+_3$

To 500  $\mu\text{L}$  of a 0.17 mM solution of  $\text{CB}[10]_2 \bullet \text{VPI-N}_3$  were added 10  $\mu\text{L}$  of a 0.2 M solution of TFA in  $\text{D}_2\text{O}$  ( $2 \times 10^{-6}$  mol, 12 equiv.). Acetone was used as internal reference (2.22 ppm).

$^1\text{H}$  NMR (500 MHz,  $\text{D}_2\text{O}$ )  $\delta$  9.13 (br s, 2H, **H2b**), 8.94 (d,  $J = 6.1$  Hz, 4H, **H2a**), 8.36 (br s, 4H, **H5a**), 8.27 (d,  $J = 8.4$  Hz, 4H, **H7a**), 8.07 (br s, 2H, **H7b**), 7.94 (br s, 2H, **H5b**), 7.84 (d,  $J = 7.8$  Hz, 4H, **H6a**), 7.74 (br s, 2H, **H8b**), 7.64 (br s, 2H, **H3b**), 7.43 (br s, 4H, **H3a**), 7.36 (s, 4H, **H8a**), 7.28 (br s, 2H, **H6b**), 7.16 (m, 6H, overlapped signals of **H4a** and **H9b**), 6.97 (m, 6H, overlapped signals of **H4b** and **H9a**), 6.48 (m, 4H, **H10a**), 6.30 (br s, 2H, **H10b**), 5.91 – 5.69 (m, 48H,  $\text{CB}[10]$ ), 5.52 (d,  $J = 33.7$  Hz, 43H,  $\text{CB}[10]$ ), 4.61 (br s, **H1a-b**), 4.20 (ddd,  $J = 23.3, 15.2, 7.4$  Hz, 49H,  $\text{CB}[10]$ ), 2.22 (acetone, ref).

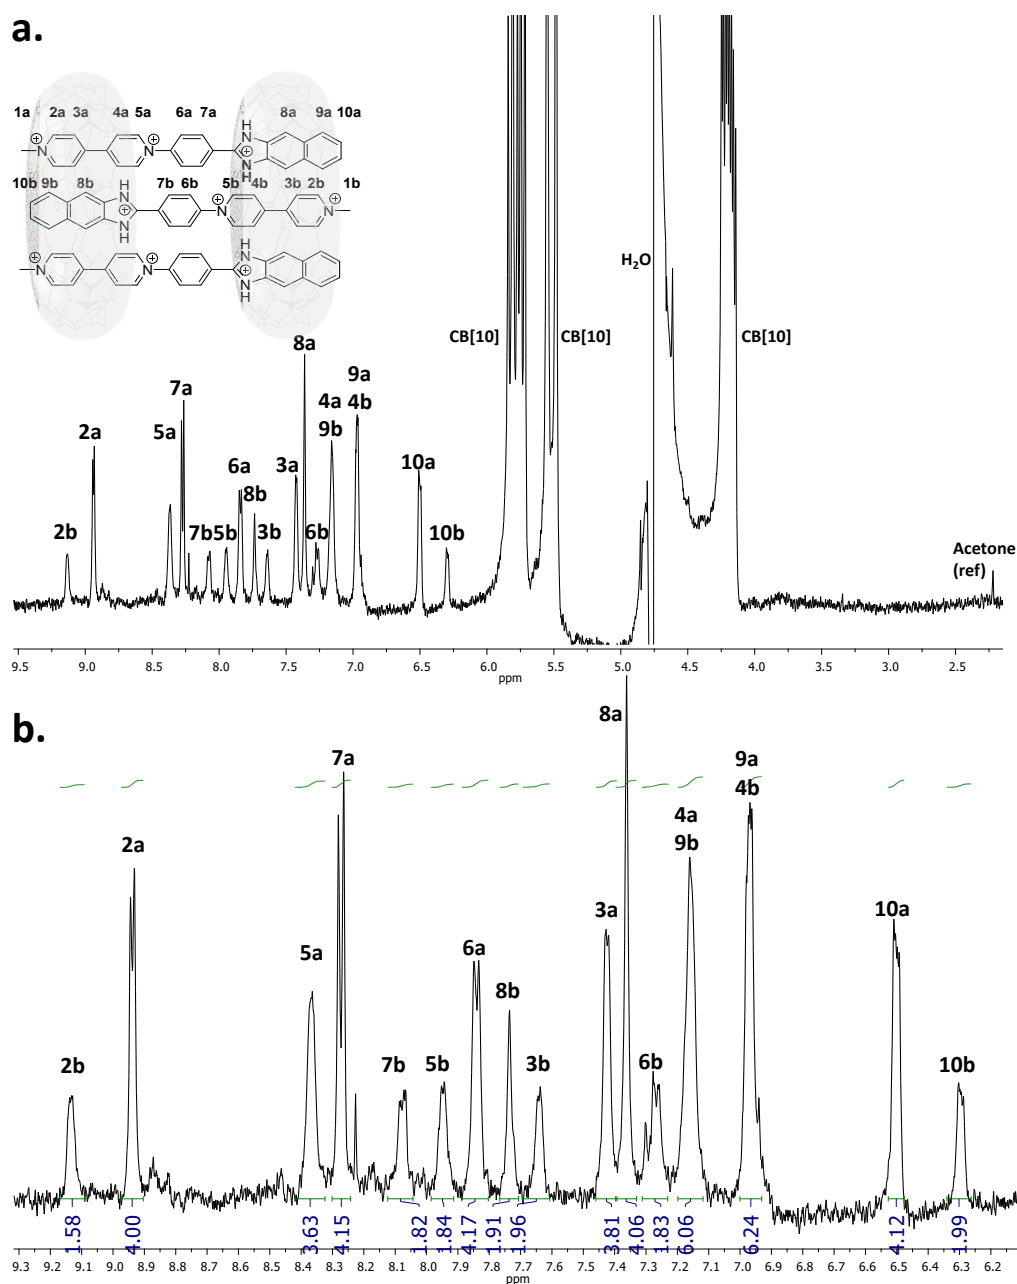

**Figure S34.**  $^1\text{H}$  NMR spectrum (500 MHz,  $\text{D}_2\text{O}$ , 300 K, 0.17 mM, full a., zoom b.) of  $\text{CB}[10]_2 \bullet \text{VPI-N-H}^+_3$  recorded after 5 days.

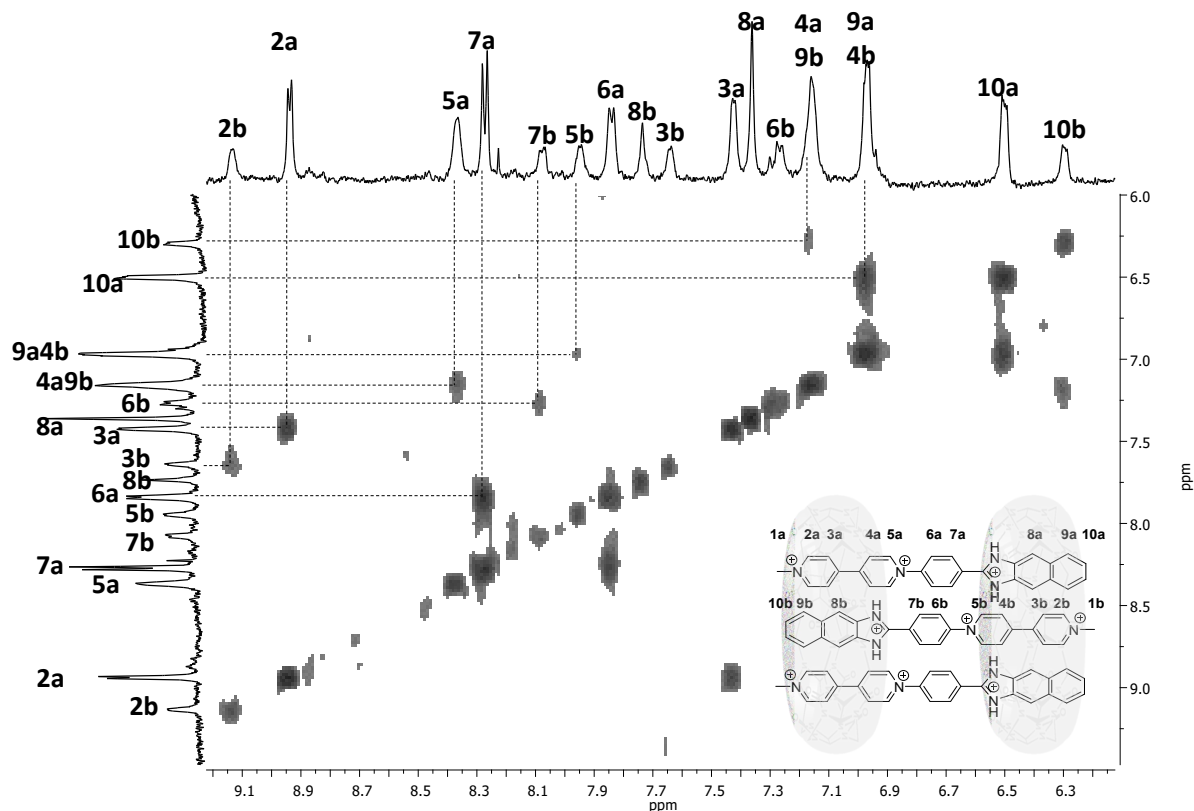

Figure S35. COSY NMR (500 MHz, D<sub>2</sub>O, 300 K, 0.17 mM) of CB[10]<sub>2</sub>•VPI-N-H<sup>+</sup><sub>3</sub>.

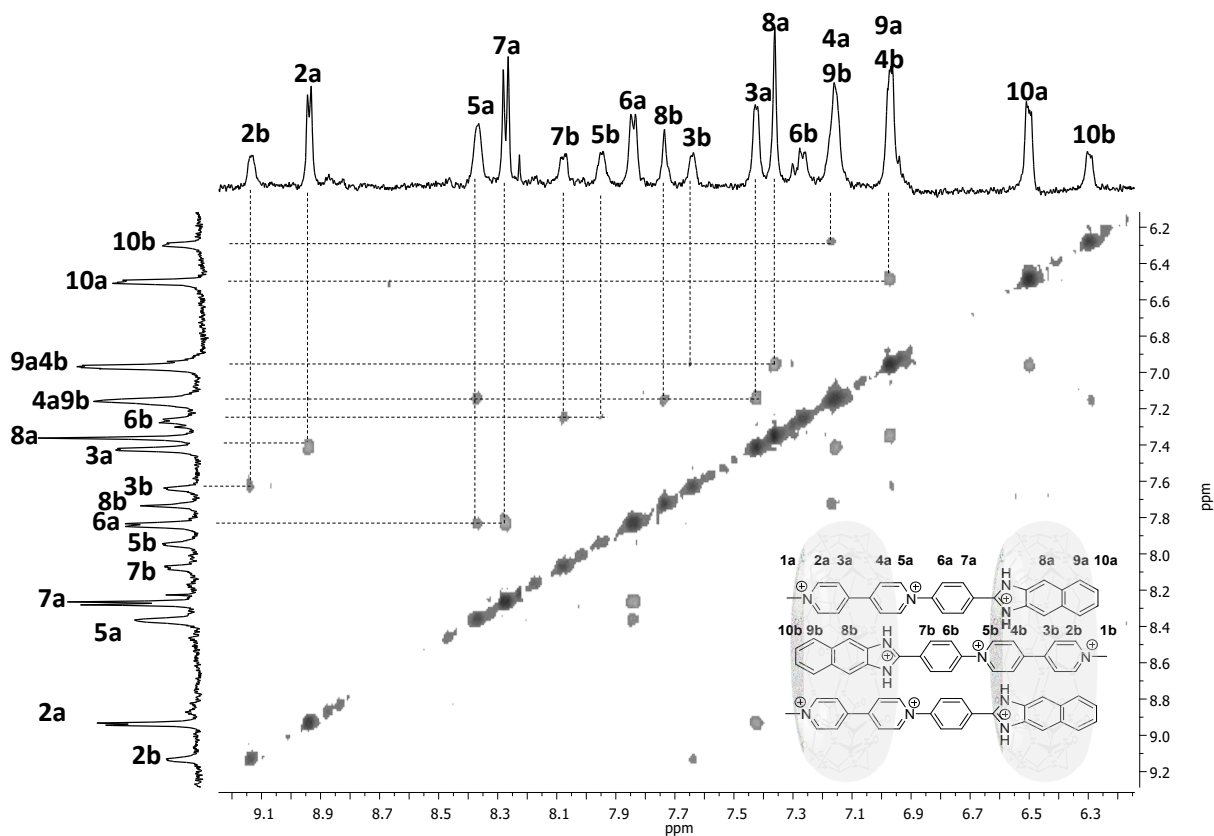

Figure S36. ROESY NMR (500 MHz, D<sub>2</sub>O, 300 K, 0.17 mM, mixing time: 400 ms) of CB[10]<sub>2</sub>•VPI-N-H<sup>+</sup><sub>3</sub>.

## 22/ References

- [1] A. Kriat, S. Pascal, B. Kauffmann, Y. Ferrand, D. Bergé-Lefranc, D. Gigmes, O. Siri, A. Kermagoret, D. Bardelang, *Chem. Eur. J.* **2023**, DOI: 10.1002/chem.202300633.
- [2] D. Bardelang, K. A. Udachin, D. M. Leek, J. C. Margeson, G. Chan, C. I. Ratcliffe, J. A. Ripmeester, *Cryst. Growth Des.* **2011**, *11*, 5598–5614.
- [3] X. R. Yang, Z. Y. Zhao, X. Z. Zhang, S. M. Liu, *Sci. China. Chem.* **2018**, *61*, 787–791.
- [4] X. Yang, Q. Cheng, V. Monnier, L. Charles, H. Karoui, O. Ouari, D. Gigmes, R. Wang, A. Kermagoret, D. Bardelang, *Angew. Chem. Int. Ed.* **2021**, *60*, 6617–6623.
- [5] G. R. Fulmer, A. J. M. Miller, N. H. Sherden, H. E. Gottlieb, A. Nudelman, B. M. Stoltz, J. E. Bercaw, K. I. Goldberg, *Organometallics* **2010**, *29*, 2176–2179.
- [6] M. A. Gamal-Eldin, D. H. Macartney, *Org. Biomol. Chem.* **2013**, *11*, 1234–1241.
- [7] H. Yin, Q. Cheng, R. Rosas, S. Viel, V. Monnier, L. Charles, D. Siri, D. Gigmes, O. Ouari, R. Wang, A. Kermagoret, D. Bardelang, *Chem. Eur. J.* **2019**, *25*, 12552–12559.
- [8] S. Liu, C. Ruspic, P. Mukhopadhyay, S. Chakrabarti, P. Y. Zavalij, L. Isaacs, *J. Am. Chem. Soc.* **2005**, *127*, 15959–15967.
